# Supplementary material for: A Complete Fossil-Calibrated Phylogeny of Seed Plant Families as a Tool for Comparative Analyses: Testing the ‘Time for Speciation’ Hypothesis
Source: PubMed Central journal article supplement (PMC5051821; doi:10.1371/journal.pone.0162907), 2016-10-05

**Figure S1. Frequency histogram of clade net diversification rate estimates from Medusa (data from Table S4).** Grey bars with models fitted assuming a relative extinction rate ( $\epsilon$ ) of 0.9, and pink bars with  $\epsilon = 0$ .

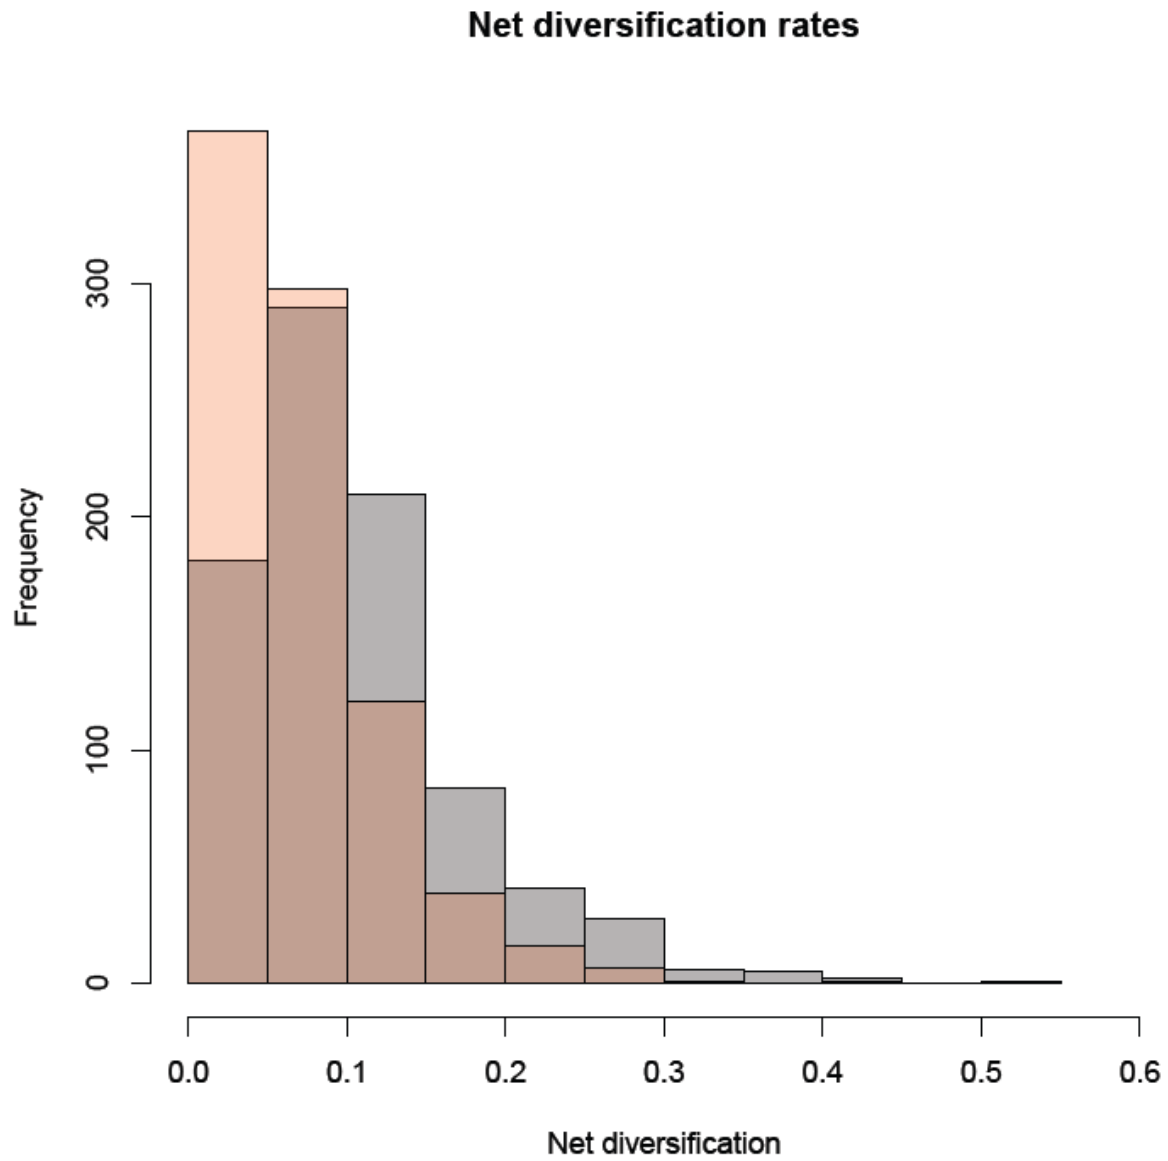

Supplement: pone.0162907.s001.pdf [file pone.0162907.s001.pdf]
