# Supplementary material for: A Complete Fossil-Calibrated Phylogeny of Seed Plant Families as a Tool for Comparative Analyses: Testing the ‘Time for Speciation’ Hypothesis
Source: PubMed Central journal article supplement (PMC5051821; doi:10.1371/journal.pone.0162907), 2016-10-05

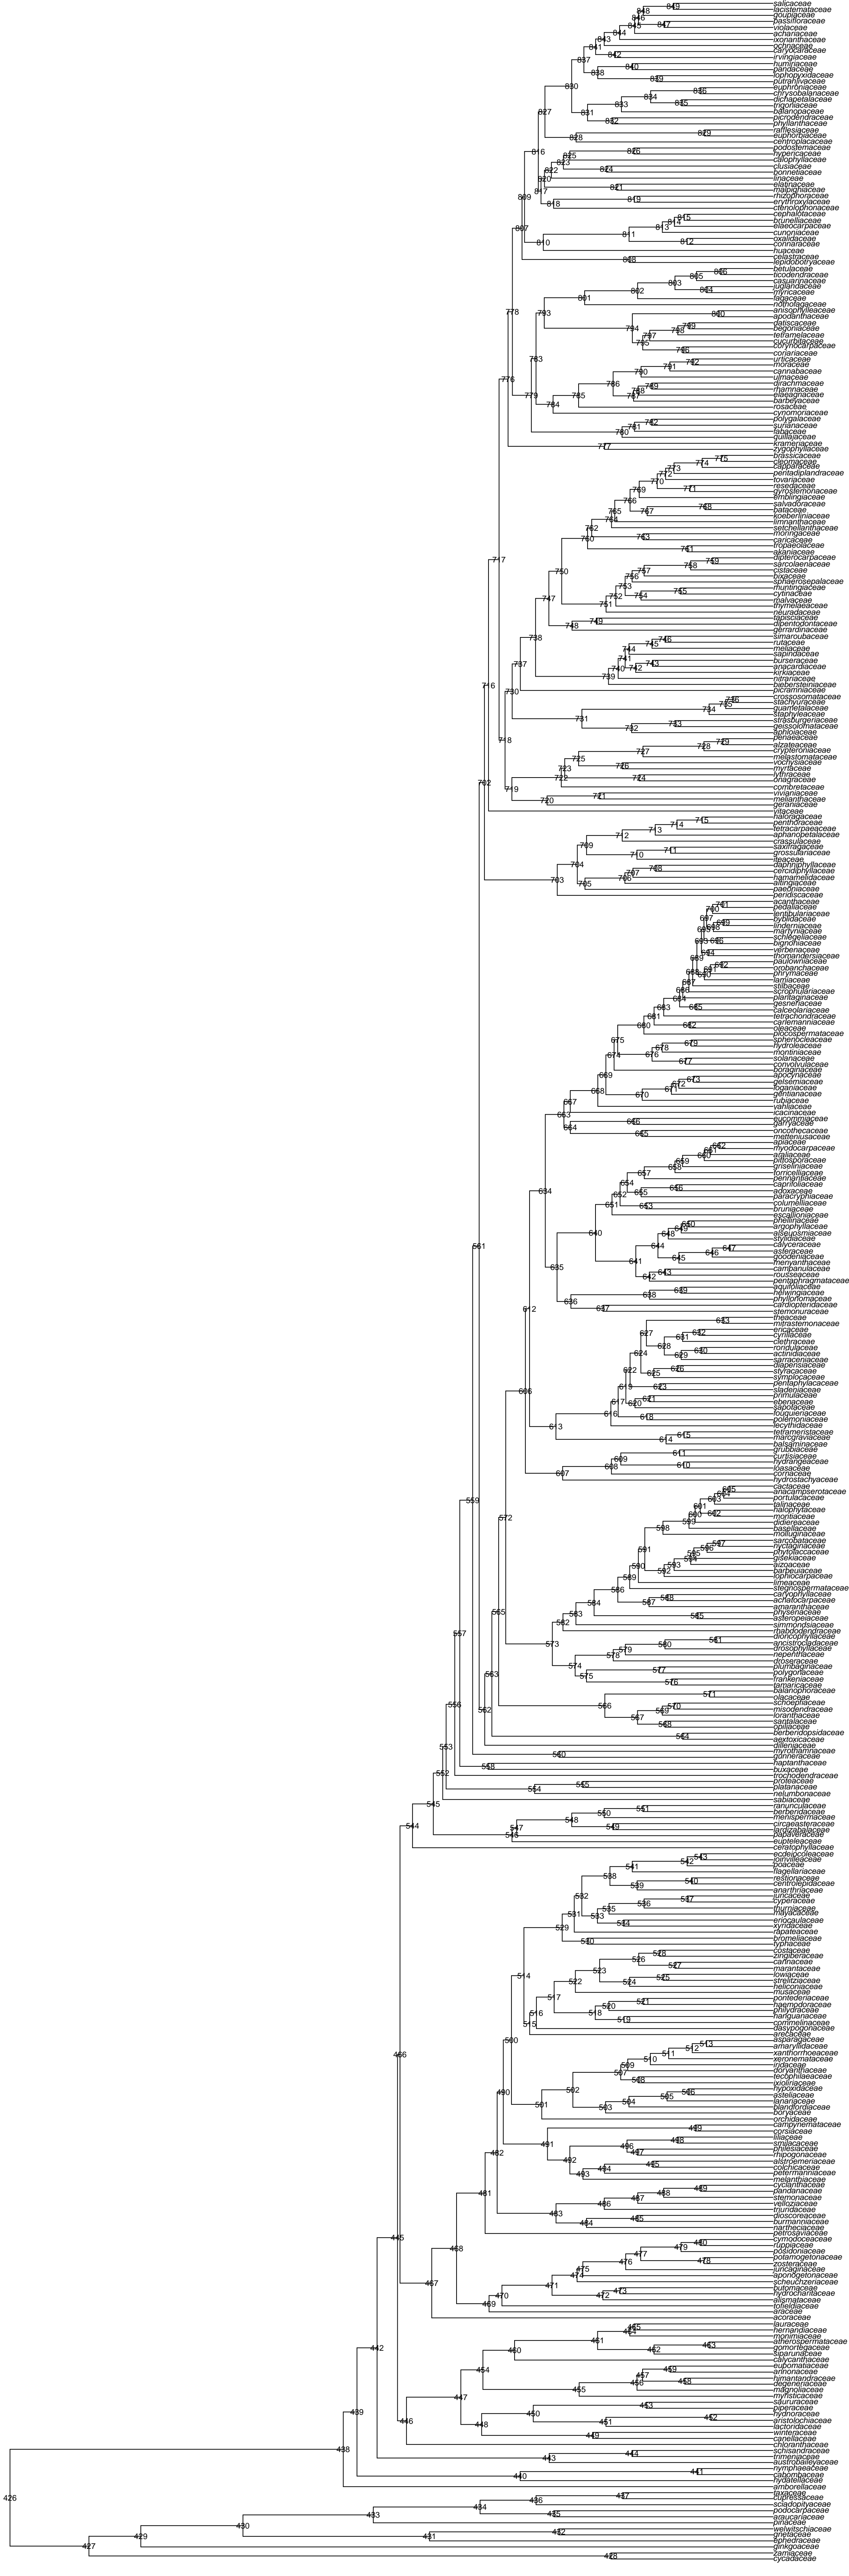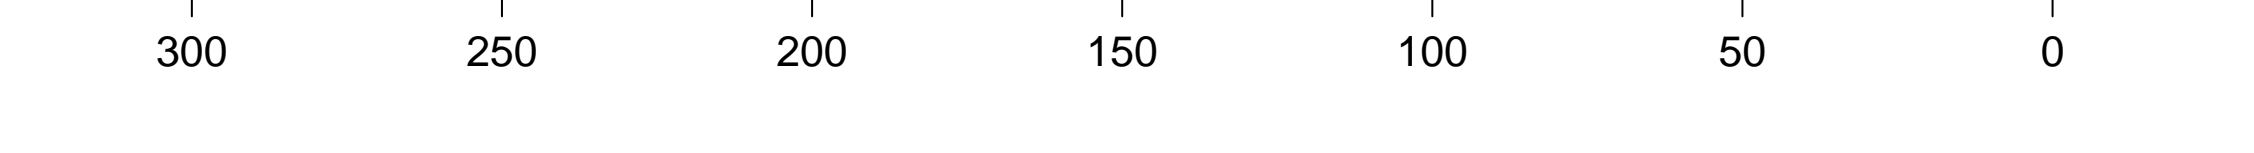

Supplement: pone.0162907.s002.pdf [file pone.0162907.s002.pdf]
