# Supplementary material for: A Complete Fossil-Calibrated Phylogeny of Seed Plant Families as a Tool for Comparative Analyses: Testing the ‘Time for Speciation’ Hypothesis
Source: PubMed Central journal article supplement (PMC5051821; doi:10.1371/journal.pone.0162907), 2016-10-05
Supplement: pone.0162907.s004.pdf [file pone.0162907.s004.pdf]

Table S2: Age constraints used to calibrate the phylogeny to time in PATHd8 and BEAST

| Clade                     | Minimum Age | Source            | Crown or Stem |
|---------------------------|-------------|-------------------|---------------|
| Angiosperms               | 132         | Bell et al. 2010  | Crown         |
| Aquifoliales              | 85          | Smith et al. 2010 | Crown         |
| Burseraceae/Anacardiaceae | 50          | Bell et al. 2010  | Crown         |
| Buxales                   | 112         | Smith et al. 2010 | Stem          |
| Canellales                | 122.5       | Smith et al. 2010 | Stem          |
| Caryophyllales            | 83.5        | Bell et al. 2010  | Crown         |
| Clusia/Hypericum          | 89          | Bell et al. 2010  | Crown         |
| Cornales                  | 86          | Bell et al. 2010  | Crown         |
| Ericales                  | 91.2        | Bell et al. 2010  | Crown         |
| Fabales                   | 59.9        | Bell et al. 2010  | Crown         |
| Fagales                   | 96          | Smith et al. 2010 | Stem          |
| Gunnerales                | 88.2        | Smith et al. 2010 | Crown         |
| Gymnosperms               | 290         | Smith et al. 2010 | Crown         |
| Lamiales                  | 44.3        | Bell et al. 2010  | Crown         |
| Laurales                  | 108.8       | Bell et al. 2010  | Crown         |
| Magnoliales               | 108.8       | Smith et al. 2010 | Stem          |
| malpighiales              | 49          | Bell et al. 2010  | Crown         |
| Malvales                  | 65.5        | Bell et al. 2010  | Crown         |
| Myrtales                  | 88.2        | Bell et al. 2010  | Crown         |
| Nymphaeales               | 105         | Smith et al. 2010 | Crown         |
| Pandanales                | 65          | Bell et al. 2010  | Crown         |
| Poales                    | 68.1        | Bell et al. 2010  | Crown         |
| Proteales                 | 98          | Bell et al. 2010  | Crown         |
| Santalales                | 51.9        | Bell et al. 2010  | Crown         |
| Sapidales                 | 65          | Bell et al. 2010  | Crown         |
| Saxifragales              | 89.3        | Smith et al. 2010 | Crown         |
| Simaroubaceae/Rutaceae    | 50          | Bell et al. 2010  | Crown         |
| Solanales                 | 44.3        | Bell et al. 2010  | Crown         |
| Zingiberales              | 83.5        | Bell et al. 2010  | Crown         |

Bell CD, Soltis DE, Soltis PS. The age and diversification of the angiosperms re-revisited. *Am J Bot.* 2010; 97(8): 1296-1303. doi:10.3732/ajb.0900346.

Smith SA, Beaulieu JM, Donoghue MJ. An uncorrelated relaxed-clock analysis suggests an earlier origin for flowering plants. *Proc Natl Acad Sci.* 2010; 107(13): 5897-902.
