# Supplementary material for: A Complete Fossil-Calibrated Phylogeny of Seed Plant Families as a Tool for Comparative Analyses: Testing the ‘Time for Speciation’ Hypothesis
Source: PubMed Central journal article supplement (PMC5051821; doi:10.1371/journal.pone.0162907), 2016-10-05
Supplement: pone.0162907.s005.pdf [file pone.0162907.s005.pdf]

**Table S3:** Species richness estimates for the 425 families in the phylogeny, calculated using the presented data mined from the Plant List, unless otherwise indicated.

| Family            | Accepted | Rejected | Unclassified | Plant List Estimate | Alternative Estimate | Alternative Source           |
|-------------------|----------|----------|--------------|---------------------|----------------------|------------------------------|
| Acanthaceae       | 3947     | 3660     | 5162         | 6625                |                      |                              |
| Achariaceae       | 101      | 115      | 218          | 203                 |                      |                              |
| Achatocarpaceae   | 11       | 6        | 0            | 11                  |                      |                              |
| Acoraceae         | 2        | 34       | 3            | 2                   |                      |                              |
| Actinidiaceae     | 176      | 177      | 277          | 314                 |                      |                              |
| Adoxaceae         | 194      | 179      | 280          | 340                 |                      |                              |
| Aextoxicaceae     | 1        | 0        | 0            | 1                   |                      |                              |
| Aizoaceae         | 2271     | 1327     | 2083         | 3586                |                      |                              |
| Akaniaceae        | 2        | 5        | 0            | 2                   |                      |                              |
| Alismataceae      | 120      | 359      | 23           | 126                 |                      |                              |
| Alseuosmiaceae    | 6        | 8        | 11           | 11                  |                      |                              |
| Alstroemeriaceae  | 259      | 365      | 33           | 273                 |                      |                              |
| Altingiaceae      | 19       | 17       | 4            | 21                  |                      |                              |
| Alzateaceae       | NA       | NA       | NA           | NA                  | 1                    | Schönenberger & Conti (2003) |
| Amaranthaceae     | 2052     | 3450     | 2369         | 2936                |                      |                              |
| Amaryllidaceae    | 2258     | 4133     | 374          | 2390                |                      |                              |
| Amborellaceae     | 1        | 0        | 0            | 1                   |                      |                              |
| Anacampserotaceae | 58       | 46       | 32           | 76                  |                      |                              |
| Anacardiaceae     | 701      | 754      | 1479         | 1414                |                      |                              |
| Anarthriaceae     | 11       | 10       | 1            | 12                  |                      |                              |
| Ancistrocladaceae | 21       | 14       | 1            | 22                  |                      |                              |
| Anisophylleaceae  | 39       | 16       | 9            | 45                  |                      |                              |
| Annonaceae        | 2106     | 1779     | 1236         | 2776                |                      |                              |
| Aphanopetalaceae  | 2        | 2        | 0            | 2                   |                      |                              |
| Aphloiaceae       | 2        | 16       | 4            | 2                   |                      |                              |
| Apiaceae          | 3257     | 5070     | 4837         | 5149                |                      |                              |
| Apocynaceae       | 5556     | 8848     | 3841         | 7038                |                      |                              |
| Apodanthaceae     | 26       | 13       | 6            | 30                  |                      |                              |
| Aponogetonaceae   | 58       | 39       | 3            | 60                  |                      |                              |
| Aquifoliaceae     | 480      | 252      | 407          | 747                 |                      |                              |
| Araceae           | 3368     | 3392     | 1345         | 4038                |                      |                              |
| Araliaceae        | 1533     | 2344     | 435          | 1705                |                      |                              |
| Araucariaceae     | 39       | 117      | 7            | 41                  |                      |                              |
| Arecaceae         | 2522     | 4443     | 376          | 2658                |                      |                              |
| Argophyllaceae    | 22       | 4        | 3            | 25                  |                      |                              |
| Aristolochiaceae  | 624      | 542      | 207          | 735                 |                      |                              |
| Asparagaceae      | 2929     | 6392     | 584          | 3113                |                      |                              |

|                    |    |      |      |      |      |    |                      |
|--------------------|----|------|------|------|------|----|----------------------|
| Asteliaceae        |    | 37   | 56   | 0    | 37   |    |                      |
| Asteraceae         | NA |      | NA   | NA   |      | NA | 23600 APG III (2009) |
| Asteropeiaceae     |    | 8    | 3    | 0    | 8    |    |                      |
| Atherospermataceae |    | 20   | 16   | 7    | 24   |    |                      |
| Austrobaileyaceae  |    | 1    | 1    | 0    | 1    |    |                      |
| Balanopaceae       |    | 9    | 8    | 0    | 9    |    |                      |
| Balanophoraceae    |    | 45   | 173  | 27   | 51   |    |                      |
| Balsaminaceae      |    | 488  | 154  | 742  | 1052 |    |                      |
| Barbeuiaceae       |    | 1    | 0    | 0    | 1    |    |                      |
| Barbeyaceae        |    | 1    | 0    | 0    | 1    |    |                      |
| Basellaceae        |    | 19   | 66   | 3    | 20   |    |                      |
| Bataceae           |    | 2    | 2    | 3    | 4    |    |                      |
| Begoniaceae        |    | 1601 | 967  | 219  | 1738 |    |                      |
| Berberidaceae      |    | 755  | 426  | 336  | 970  |    |                      |
| Berberidopsidaceae |    | 2    | 1    | 1    | 3    |    |                      |
| Betulaceae         |    | 234  | 622  | 108  | 264  |    |                      |
| Biebersteiniaceae  |    | 5    | 6    |      | 5    |    |                      |
| Bignoniaceae       |    | 852  | 2453 | 322  | 935  |    |                      |
| Bixaceae           |    | 23   | 67   | 6    | 25   |    |                      |
| Blandfordiaceae    |    | 4    | 9    | 1    | 4    |    |                      |
| Bonnetiaceae       |    | 36   | 20   | 21   | 50   |    |                      |
| Boraginaceae       |    | 2686 | 3858 | 3993 | 4325 |    |                      |
| Boryaceae          |    | 12   | 11   | 2    | 13   |    |                      |
| Brassicaceae       |    | 4060 | 8948 | 2693 | 4901 |    |                      |
| Bromeliaceae       |    | 3320 | 3194 | 300  | 3473 |    |                      |
| Brunelliaceae      |    | 60   | 15   | 7    | 66   |    |                      |
| Bruniaceae         |    | 92   | 152  | 71   | 119  |    |                      |
| Burmanniaceae      |    | 163  | 193  | 3    | 164  |    |                      |
| Burseraceae        |    | 649  | 885  | 367  | 804  |    |                      |
| Butomaceae         |    | 2    | 4    | 0    | 2    |    |                      |
| Buxaceae           |    | 122  | 90   | 36   | 143  |    |                      |
| Byblidaceae        |    | 7    | 3    | 0    | 7    |    |                      |
| Cabombaceae        |    | 6    | 18   | 2    | 7    |    |                      |
| Cactaceae          |    | 2233 | 5422 | 5504 | 3839 |    |                      |
| Calceolariaceae    |    | 281  | 458  | 55   | 302  |    |                      |
| Calophyllaceae     |    | 127  | 69   | 184  | 246  |    |                      |
| Calycanthaceae     |    | 10   | 50   | 4    | 11   |    |                      |
| Calyceraceae       |    | 56   | 86   | 19   | 63   |    |                      |
| Campanulaceae      |    | 2385 | 4492 | 304  | 2490 |    |                      |
| Campynemataceae    |    | 4    | 2    | 0    | 4    |    |                      |
| Canellaceae        |    | 21   | 14   | 3    | 23   |    |                      |
| Cannabaceae        |    | 102  | 383  | 151  | 134  |    |                      |
| Cannaceae          |    | 12   | 164  | 9    | 13   |    |                      |
| Capparaceae        |    | 449  | 731  | 306  | 565  |    |                      |

|                   |      |       |      |      |
|-------------------|------|-------|------|------|
| Caprifoliaceae    | 857  | 1272  | 1947 | 1641 |
| Cardiopteridaceae | 46   | 88    | 24   | 54   |
| Caricaceae        | 47   | 126   | 17   | 52   |
| Carlemanniaceae   | 5    | 3     | 1    | 6    |
| Caryocaraceae     | 26   | 31    | 2    | 27   |
| Caryophyllaceae   | 2456 | 3928  | 4247 | 4090 |
| Casuarinaceae     | 91   | 102   | 5    | 93   |
| Celastraceae      | 1168 | 1431  | 1339 | 1770 |
| Centrolepidaceae  | 36   | 62    | 2    | 37   |
| Centroplacaceae   | 8    | 5     | 4    | 10   |
| Cephalotaceae     | 1    | 0     | 0    | 1    |
| Ceratophyllaceae  | 4    | 42    | 1    | 4    |
| Cercidiphyllaceae | 2    | 1     | 1    | 3    |
| Chloranthaceae    | 71   | 85    | 28   | 84   |
| Chrysobalanaceae  | 535  | 563   | 23   | 546  |
| Circaeasteraceae  | 2    | 0     | 0    | 2    |
| Cistaceae         | 201  | 435   | 671  | 413  |
| Cleomaceae        | 257  | 336   | 171  | 331  |
| Clethraceae       | 85   | 134   | 17   | 92   |
| Clusiaceae        | 1047 | 539   | 385  | 1301 |
| Colchicaceae      | 284  | 542   | 18   | 290  |
| Columelliaceae    | 8    | 18    | 0    | 8    |
| Combretaceae      | 480  | 693   | 613  | 731  |
| Commelinaceae     | 728  | 1368  | 83   | 757  |
| Connaraceae       | 267  | 500   | 254  | 355  |
| Convolvulaceae    | 1296 | 1596  | 3121 | 2695 |
| Coriariaceae      | 16   | 16    | 0    | 16   |
| Cornaceae         | 124  | 523   | 37   | 131  |
| Corsiaceae        | 27   | 1     | 0    | 27   |
| Corynocarpaceae   | 5    | 2     | 0    | 5    |
| Costaceae         | 139  | 168   | 7    | 142  |
| Crassulaceae      | 1482 | 2329  | 1746 | 2161 |
| Crossosomataceae  | 8    | 13    | 2    | 9    |
| Crypteroniaceae   | NA   | NA    | NA   | NA   |
| Ctenolophonaceae  | 2    | 2     | 0    | 2    |
| Cucurbitaceae     | 965  | 1680  | 1074 | 1357 |
| Cunoniaceae       | 245  | 167   | 345  | 450  |
| Cupressaceae      | 166  | 991   | 46   | 173  |
| Curtisiaceae      | 1    | 6     | 0    | 1    |
| Cycadaceae        | 92   | 70    | 7    | 96   |
| Cyclanthaceae     | 231  | 140   | 31   | 250  |
| Cymodoceaceae     | 16   | 64    | 2    | 16   |
| Cynomoriaceae     | 1    | 2     | 0    | 1    |
| Cyperaceae        | 5784 | 12391 | 637  | 5987 |

|                  |      |      |      |      |       |                  |
|------------------|------|------|------|------|-------|------------------|
| Cyrillaceae      | 8    | 20   | 4    | 9    |       |                  |
| Cytinaceae       | 11   | 24   | 3    | 12   |       |                  |
| Daphniphyllaceae | 34   | 61   | 2    | 35   |       |                  |
| Dasyogonaceae    | 16   | 3    | 1    | 17   |       |                  |
| Datisceae        | 2    | 6    | 1    | 2    |       |                  |
| Degeneriaceae    | 2    | 0    | 0    | 2    |       |                  |
| Diapensiaceae    | 12   | 22   | 21   | 19   |       |                  |
| Dichapetalaceae  | 196  | 286  | 47   | 215  |       |                  |
| Didiereaceae     | 22   | 16   | 2    | 23   |       |                  |
| Dilleniaceae     | 219  | 250  | 579  | 489  |       |                  |
| Dioncophyllaceae | 3    | 0    | 2    | 5    |       |                  |
| Dioscoreaceae    | 653  | 721  | 55   | 679  |       |                  |
| Dipentodontaceae | 21   | 18   | 4    | 23   |       |                  |
| Dipterocarpaceae | 147  | 234  | 843  | 472  |       |                  |
| Dirachmaceae     | 2    | 0    | 0    | 2    |       |                  |
| Doryanthaceae    | 2    | 3    | 0    | 2    |       |                  |
| Droseraceae      | 189  | 188  | 10   | 194  |       |                  |
| Drosophyllaceae  | 1    | 3    | 1    | 1    |       |                  |
| Ebenaceae        | 751  | 876  | 71   | 784  |       |                  |
| Ecdeiocoleaceae  | 3    | 0    | 0    | 3    |       |                  |
| Elaeagnaceae     | 108  | 100  | 42   | 130  |       |                  |
| Elaeocarpaceae   | 644  | 406  | 297  | 826  |       |                  |
| Elatinaceae      | 57   | 85   | 32   | 70   |       |                  |
| Emblingiaceae    | 1    | 0    | 0    | 1    |       |                  |
| Ephedraceae      | 70   | 92   | 2    | 71   |       |                  |
| Ericaceae        | 3554 | 4646 | 3889 | 5240 |       |                  |
| Eriocaulaceae    | 1206 | 1074 | 31   | 1222 |       |                  |
| Erythroxylaceae  | 267  | 146  | 36   | 290  |       |                  |
| Escalloniaceae   | 55   | 111  | 118  | 94   |       |                  |
| Eucommiaceae     | 1    | 0    | 0    | 1    |       |                  |
| Euphorbiaceae    | 6547 | 9874 | 489  | 6742 |       |                  |
| Euphroniaceae    | 4    | 3    | 1    | 5    |       |                  |
| Eupomatiaceae    | 3    | 0    | 0    | 3    |       |                  |
| Eupteleaceae     | 2    | 4    | 1    | 2    |       |                  |
| Fabaceae         | NA   | NA   | NA   | NA   | 19400 | Judd et al. 2002 |
| Fagaceae         | 1101 | 2824 | 216  | 1162 |       |                  |
| Flagellariaceae  | 4    | 5    | 3    | 5    |       |                  |
| Fouquieriaceae   | 12   | 8    | 4    | 14   |       |                  |
| Frankeniaceae    | 73   | 88   | 16   | 80   |       |                  |
| Garryaceae       | 25   | 23   | 4    | 27   |       |                  |
| Geissolomataceae | 1    | 1    | 1    | 2    |       |                  |
| Gelsemiaceae     | 13   | 42   | 16   | 17   |       |                  |
| Gentianaceae     | 1682 | 2923 | 1357 | 2178 |       |                  |
| Geraniaceae      | 841  | 912  | 2114 | 1855 |       |                  |

|                  |      |      |      |      |                  |
|------------------|------|------|------|------|------------------|
| Gerrardinaceae   | 2    | 0    | 0    | 2    |                  |
| Gesneriaceae     | 3122 | 2924 | 1844 | 4074 |                  |
| Ginkgoaceae      | 1    | 6    | 1    | 1    |                  |
| Gisekiaceae      | 7    | 15   | 2    | 8    |                  |
| Gnetaceae        | 41   | 67   | 10   | 45   |                  |
| Gomortegaceae    | 1    | 3    | 0    | 1    |                  |
| Goodeniaceae     | 329  | 194  | 354  | 552  |                  |
| Goupiaceae       | 2    | 4    | 1    | 2    |                  |
| Griselinaceae    | NA   | NA   | NA   | NA   | 7 APG III (2009) |
| Grossulariaceae  | 195  | 153  | 344  | 388  |                  |
| Grubbiaceae      | 3    | 8    | 5    | 4    |                  |
| Guamatelaceae    | NA   | NA   | NA   | NA   | 1 APG III (2009) |
| Gunneraceae      | 69   | 37   | 5    | 72   |                  |
| Gyrostemonaceae  | 17   | 23   | 13   | 23   |                  |
| Haemodoraceae    | 101  | 94   | 6    | 104  |                  |
| Halophytaceae    | 1    | 1    | 0    | 1    |                  |
| Haloragaceae     | 92   | 111  | 169  | 169  |                  |
| Hamamelidaceae   | 99   | 73   | 63   | 135  |                  |
| Hanguanaceae     | 10   | 8    | 0    | 10   |                  |
| Haptanthaceae    | 1    | 0    | 0    | 1    |                  |
| Heliconiaceae    | 204  | 176  | 9    | 209  |                  |
| Helwingiaceae    | 4    | 8    | 0    | 4    |                  |
| Hernandiaceae    | 51   | 40   | 40   | 73   |                  |
| Himantandraceae  | 1    | 8    | 0    | 1    |                  |
| Huaceae          | 4    | 0    | 2    | 6    |                  |
| Humiriaceae      | 63   | 68   | 24   | 75   |                  |
| Hydatellaceae    | 12   | 7    | 0    | 12   |                  |
| Hydnoraceae      | 10   | 21   | 1    | 10   |                  |
| Hydrangeaceae    | 237  | 224  | 193  | 336  |                  |
| Hydrocharitaceae | 133  | 414  | 23   | 139  |                  |
| Hydroleaceae     | 11   | 41   | 33   | 18   |                  |
| Hydrostachyaceae | 19   | 10   | 8    | 24   |                  |
| Hypericaceae     | 584  | 772  | 359  | 739  |                  |
| Hypoxidaceae     | 154  | 292  | 25   | 163  |                  |
| Icacinaceae      | 212  | 247  | 89   | 253  |                  |
| Iridaceae        | 2315 | 4512 | 319  | 2423 |                  |
| Irvingiaceae     | 11   | 60   | 2    | 11   |                  |
| Iteaceae         | 19   | 17   | 16   | 27   |                  |
| Ixioliriaceae    | 4    | 17   | 0    | 4    |                  |
| Ixonanthaceae    | 20   | 10   | 39   | 46   |                  |
| Joinvilleaceae   | 4    | 5    | 0    | 4    |                  |
| Juglandaceae     | 89   | 142  | 169  | 154  |                  |
| Juncaceae        | 506  | 847  | 58   | 528  |                  |
| Juncaginaceae    | 35   | 74   | 16   | 40   |                  |

|                  |      |       |      |      |
|------------------|------|-------|------|------|
| Kirkiaceae       | 5    | 2     | 5    | 9    |
| Koerberliniaceae | 2    | 0     | 0    | 2    |
| Krameriaceae     | 25   | 27    | 3    | 26   |
| Lacistemataceae  | 13   | 35    | 13   | 17   |
| Lactoridaceae    | 1    | 0     | 0    | 1    |
| Lamiaceae        | 7886 | 13178 | 1490 | 8444 |
| Lanariaceae      | 1    | 7     | 0    | 1    |
| Lardizabalaceae  | 37   | 33    | 15   | 45   |
| Lauraceae        | 2978 | 2512  | 2035 | 4082 |
| Lecythidaceae    | 341  | 808   | 37   | 352  |
| Lentibulariaceae | 312  | 448   | 195  | 392  |
| Lepidobotryaceae | 2    | 0     | 0    | 2    |
| Liliaceae        | 746  | 1295  | 88   | 778  |
| Limeaceae        | 20   | 15    | 39   | 42   |
| Limnanthaceae    | 9    | 12    | 8    | 12   |
| Linaceae         | 213  | 199   | 345  | 391  |
| Linderniaceae    | 164  | 259   | 425  | 329  |
| Loasaceae        | 314  | 320   | 165  | 396  |
| Loganiaceae      | 351  | 371   | 470  | 579  |
| Lophiocarpaceae  | 5    | 16    | 4    | 6    |
| Lophopyxidaceae  | NA   | NA    | NA   | NA   |
| Loranthaceae     | 886  | 1741  | 1526 | 1401 |
| Lowiaceae        | 17   | 6     | 1    | 18   |
| Lythraceae       | 604  | 685   | 533  | 854  |
| Magnoliaceae     | 250  | 672   | 78   | 271  |
| Malpighiaceae    | 1301 | 1129  | 598  | 1621 |
| Malvaceae        | 4465 | 5190  | 4856 | 6711 |
| Marantaceae      | 569  | 907   | 77   | 599  |
| Marcgraviaceae   | 137  | 105   | 48   | 164  |
| Martyniaceae     | 21   | 29    | 24   | 31   |
| Mayacaceae       | 6    | 16    | 2    | 7    |
| Melanthiaceae    | 181  | 442   | 16   | 186  |
| Melastomataceae  | 4079 | 2477  | 5847 | 7717 |
| Meliaceae        | 669  | 1861  | 668  | 846  |
| Melianthaceae    | 20   | 66    | 4    | 21   |
| Menispermaceae   | 448  | 585   | 636  | 724  |
| Menyanthaceae    | 55   | 73    | 117  | 105  |
| Metteniusaceae   | 3    | 2     | 4    | 5    |
| Misodendraceae   | 8    | 13    | 21   | 16   |
| Mitrastemonaceae | 2    | 4     | 2    | 3    |
| Molluginaceae    | 103  | 82    | 111  | 165  |
| Monimiaceae      | 134  | 89    | 345  | 341  |
| Montiaceae       | 113  | 249   | 106  | 146  |
| Montiniaceae     | 4    | 1     | 1    | 5    |

2 Watson &  
Dallwitz 2013

|                    |       |       |      |       |                   |
|--------------------|-------|-------|------|-------|-------------------|
| Moraceae           | 1217  | 2880  | 778  | 1448  |                   |
| Moringaceae        | 13    | 5     | 32   | 36    |                   |
| Muntingiaceae      | 3     | 1     | 1    | 4     |                   |
| Musaceae           | 78    | 152   | 5    | 80    |                   |
| Myodocarpaceae     | 15    | 13    | 0    | 15    |                   |
| Myricaceae         | 53    | 70    | 92   | 93    |                   |
| Myristicaceae      | 170   | 206   | 768  | 517   |                   |
| Myrothamnaceae     | 2     | 1     | 0    | 2     |                   |
| Myrtaceae          | 5970  | 7475  | 544  | 6212  |                   |
| Nartheciaceae      | 36    | 67    | 1    | 36    |                   |
| Nelumbonaceae      | 2     | 15    | 28   | 5     |                   |
| Nepenthaceae       | 7     | 5     | 247  | 151   |                   |
| Neuradaceae        | 7     | 9     | 3    | 8     |                   |
| Nitrariaceae       | 12    | 15    | 11   | 17    |                   |
| Nothofagaceae      | 38    | 63    | 7    | 41    |                   |
| Nyctaginaceae      | 450   | 540   | 430  | 645   |                   |
| Nymphaeaceae       | 70    | 145   | 252  | 152   |                   |
| Ochnaceae          | 560   | 577   | 961  | 1033  |                   |
| Olacaceae          | 149   | 181   | 168  | 225   |                   |
| Oleaceae           | 688   | 1867  | 106  | 717   |                   |
| Onagraceae         | 832   | 1504  | 954  | 1172  |                   |
| Oncothecaceae      | 1     | 0     | 3    | 4     |                   |
| Opiliaceae         | 33    | 78    | 16   | 38    |                   |
| Orchidaceae        | 27801 | 39992 | 2595 | 28865 |                   |
| Orobanchaceae      | 1613  | 1443  | 2344 | 2850  |                   |
| Oxalidaceae        | 601   | 931   | 688  | 871   |                   |
| Paeoniaceae        | 36    | 128   | 15   | 39    |                   |
| Pandaceae          | 17    | 51    | 8    | 19    |                   |
| Pandanaceae        | 1062  | 627   | 21   | 1075  |                   |
| Papaveraceae       | 920   | 1099  | 699  | 1239  |                   |
| Paracryphiaceae    | 29    | 12    | 9    | 35    |                   |
| Passifloraceae     | 932   | 790   | 527  | 1217  |                   |
| Paulowniaceae      | 20    | 21    | 14   | 27    |                   |
| Pedaliaceae        | 67    | 43    | 84   | 118   |                   |
| Penaecaceae        | 45    | 51    | 96   | 90    |                   |
| Pennantiaceae      | NA    | NA    | NA   | NA    | 2 Mabberley 2008  |
| Pentadiplandraceae | 1     | 3     | 1    | 1     |                   |
| Pentaphragmataceae | 2     | 5     | 38   | 13    |                   |
| Pentaphylacaceae   | 429   | 389   | 269  | 570   |                   |
| Penthoraceae       | 2     | 2     | 1    | 3     |                   |
| Peridiscaceae      | 9     | 2     | 2    | 11    |                   |
| Petermanniaceae    | 1     | 0     | 0    | 1     |                   |
| Petrosaviaceae     | 4     | 8     | 0    | 4     |                   |
| Phellinaceae       | NA    | NA    | NA   | NA    | 12 APG III (2009) |

|                   |       |       |       |       |
|-------------------|-------|-------|-------|-------|
| Philesiaceae      | 2     | 6     | 1     | 2     |
| Philydraceae      | 6     | 8     | 1     | 6     |
| Phrymaceae        | 199   | 96    | 211   | 341   |
| Phyllanthaceae    | 2099  | 3150  | 179   | 2171  |
| Phyllonomaceae    | 5     | 6     | 0     | 5     |
| Physenaceae       | 2     | 0     | 0     | 2     |
| Phytolaccaceae    | 62    | 149   | 87    | 88    |
| Picramniaceae     | 48    | 42    | 25    | 61    |
| Picrodendraceae   | 96    | 105   | 10    | 101   |
| Pinaceae          | 255   | 1209  | 66    | 266   |
| Piperaceae        | 2658  | 2121  | 2344  | 3962  |
| Pittosporaceae    | 170   | 147   | 302   | 332   |
| Plantaginaceae    | 1614  | 1989  | 3450  | 3159  |
| Platanaceae       | 9     | 38    | 3     | 10    |
| Plocospermataceae | 1     | 4     | 1     | 1     |
| Plumbaginaceae    | 635   | 630   | 1075  | 1175  |
| Poaceae           | 11554 | 32806 | 3065  | 12352 |
| Podocarpaceae     | 191   | 432   | 27    | 199   |
| Podostemaceae     | 250   | 197   | 273   | 403   |
| Polemoniaceae     | 455   | 428   | 631   | 780   |
| Polygalaceae      | 1163  | 584   | 1123  | 1911  |
| Polygonaceae      | 1384  | 1880  | 2120  | 2283  |
| Pontederiaceae    | 33    | 167   | 6     | 34    |
| Portulacaceae     | 258   | 384   | 243   | 356   |
| Posidoniaceae     | 10    | 11    | 6     | 13    |
| Potamogetonaceae  | 186   | 497   | 53    | 200   |
| Primulaceae       | 2788  | 3140  | 2195  | 3820  |
| Proteaceae        | 1252  | 866   | 2238  | 2575  |
| Putranjivaceae    | 216   | 229   | 8     | 220   |
| Quillajaceae      | 2     | 2     | 9     | 7     |
| Rafflesiaceae     | 22    | 10    | 22    | 37    |
| Ranunculaceae     | 2377  | 3260  | 3422  | 3820  |
| Rapateaceae       | 95    | 34    | 3     | 97    |
| Resedaceae        | 51    | 110   | 162   | 102   |
| Restionaceae      | 482   | 676   | 12    | 487   |
| Rhabdodendraceae  | 3     | 12    | 0     | 3     |
| Rhamnaceae        | 839   | 827   | 1252  | 1470  |
| Rhipogonaceae     | 6     | 5     | 0     | 6     |
| Rhizophoraceae    | 142   | 180   | 97    | 185   |
| Roridulaceae      | 2     | 4     | 0     | 2     |
| Rosaceae          | 4828  | 7041  | 16996 | 11742 |
| Rousseaceae       | 14    | 8     | 1     | 15    |
| Rubiaceae         | 13673 | 16393 | 1288  | 14259 |
| Ruppiaceae        | 8     | 28    | 0     | 8     |



|                    |      |      |      |      |
|--------------------|------|------|------|------|
| Rutaceae           | 1730 | 2634 | 2318 | 2649 |
| Sabiaceae          | 116  | 98   | 158  | 202  |
| Salicaceae         | 1269 | 1711 | 2141 | 2181 |
| Salvadoraceae      | 8    | 17   | 33   | 19   |
| Santalaceae        | 992  | 743  | 699  | 1392 |
| Sapindaceae        | 1751 | 1559 | 1571 | 2582 |
| Sapotaceae         | 1343 | 3401 | 176  | 1393 |
| Sarcobataceae      | 2    | 2    | 2    | 3    |
| Sarcolaenaceae     | 69   | 28   | 5    | 73   |
| Sarraceniaceae     | 32   | 8    | 64   | 83   |
| Saururaceae        | 7    | 18   | 2    | 8    |
| Saxifragaceae      | 775  | 924  | 1073 | 1264 |
| Scheuchzeriaceae   | 1    | 5    | 0    | 1    |
| Schisandraceae     | 73   | 83   | 25   | 85   |
| Schlegeliaceae     | 43   | 24   | 6    | 47   |
| Schoepfiaceae      | 51   | 47   | 31   | 67   |
| Sciadopityaceae    | 1    | 3    | 0    | 1    |
| Scrophulariaceae   | 1576 | 1017 | 2396 | 3032 |
| Setchellanthaceae  | 1    | 0    | 0    | 1    |
| Simaroubaceae      | 121  | 152  | 127  | 177  |
| Simmondsiaceae     | 2    | 0    | 3    | 5    |
| Siparunaceae       | 61   | 198  | 8    | 63   |
| Sladeniaceae       | 3    | 0    | 0    | 3    |
| Smilacaceae        | 261  | 431  | 40   | 276  |
| Solanaceae         | 2678 | 2592 | 3128 | 4268 |
| Sphaerosepalaceae  | 20   | 6    | 3    | 22   |
| Sphenocleaceae     | 2    | 8    | 1    | 2    |
| Stachyuraceae      | 7    | 8    | 8    | 11   |
| Staphyleaceae      | 30   | 48   | 56   | 52   |
| Stegnospermataceae | 5    | 1    | 0    | 5    |
| Stemonaceae        | 36   | 33   | 5    | 39   |
| Stemonuraceae      | 71   | 183  | 8    | 73   |
| Stilbaceae         | 38   | 103  | 10   | 41   |
| Strasburgeriaceae  | 2    | 1    | 1    | 3    |
| Strelitziaceae     | 7    | 31   | 1    | 7    |
| Stylidiaceae       | 31   | 109  | 348  | 108  |
| Styracaceae        | 133  | 184  | 118  | 183  |
| Surianaceae        | 6    | 6    | 2    | 7    |
| Symplocaceae       | 210  | 341  | 552  | 420  |
| Talinaceae         | 28   | 56   | 34   | 39   |
| Tamaricaceae       | 79   | 78   | 134  | 146  |
| Tapisciaceae       | 6    | 1    | 0    | 6    |
| Taxaceae           | 31   | 126  | 4    | 32   |
| Tecophilaeaceae    | 26   | 48   | 3    | 27   |

|                  |    |      |      |      |      |                        |
|------------------|----|------|------|------|------|------------------------|
| Tetracarpaeaceae | NA | NA   | NA   | NA   | 1    | Kubitzki 2007          |
| Tetrachondraceae |    | 3    | 5    | 2    | 4    |                        |
| Tetramelaceae    |    | 1    | 2    | 5    | 3    |                        |
| Tetrameristaceae |    | 2    | 0    | 4    | 6    |                        |
| Theaceae         |    | 370  | 468  | 264  | 487  |                        |
| Thomandersiaceae | NA | NA   | NA   | NA   | 6    | Wortley et al. 2007    |
| Thurniaceae      |    | 4    | 7    | 0    | 4    |                        |
| Thymelaeaceae    |    | 938  | 1121 | 551  | 1189 |                        |
| Ticodendraceae   |    | 1    | 0    | 0    | 1    |                        |
| Tofieldiaceae    |    | 29   | 110  | 0    | 29   |                        |
| Torricelliaceae  |    | 8    | 9    | 2    | 9    |                        |
| Tovariaceae      |    | 2    | 1    | 0    | 2    |                        |
| Trigoniaceae     |    | 32   | 20   | 17   | 42   |                        |
| Trimeniaceae     | NA | NA   | NA   | NA   | 5    | Watson & Dallwitz 2013 |
| Triuridaceae     |    | 54   | 86   | 1    | 54   |                        |
| Trochodendraceae |    | 2    | 1    | 0    | 2    |                        |
| Tropaeolaceae    |    | 89   | 117  | 78   | 123  |                        |
| Typhaceae        |    | 65   | 143  | 10   | 68   |                        |
| Ulmaceae         |    | 64   | 109  | 134  | 114  |                        |
| Urticaceae       |    | 1465 | 1491 | 1961 | 2437 |                        |
| Vahliaceae       |    | 5    | 24   | 9    | 7    |                        |
| Velloziaceae     |    | 278  | 227  | 42   | 301  |                        |
| Verbenaceae      |    | 1035 | 1495 | 182  | 1109 |                        |
| Violaceae        |    | 806  | 692  | 1811 | 1780 |                        |
| Vitaceae         |    | 985  | 1255 | 785  | 1330 |                        |
| Vivianiaceae     |    | 16   | 33   | 41   | 29   |                        |
| Vochysiaceae     |    | 215  | 106  | 77   | 267  |                        |
| Welwitschiaceae  |    | 1    | 2    | 0    | 1    |                        |
| Winteraceae      |    | 32   | 78   | 131  | 70   |                        |
| Xanthorrhoeaceae |    | 1236 | 1854 | 254  | 1338 |                        |
| Xeronemataceae   |    | 2    | 1    | 0    | 2    |                        |
| Xyridaceae       |    | 387  | 228  | 17   | 398  |                        |
| Zamiaceae        |    | 216  | 241  | 21   | 226  |                        |
| Zingiberaceae    |    | 1587 | 1658 | 101  | 1636 |                        |
| Zosteraceae      |    | 23   | 30   | 2    | 24   |                        |
| Zygophyllaceae   |    | 211  | 207  | 345  | 385  |                        |

---
