# Supplementary material for: A Complete Fossil-Calibrated Phylogeny of Seed Plant Families as a Tool for Comparative Analyses: Testing the ‘Time for Speciation’ Hypothesis
Source: PubMed Central journal article supplement (PMC5051821; doi:10.1371/journal.pone.0162907), 2016-10-05
Supplement: pone.0162907.s006.pdf [file pone.0162907.s006.pdf]

Table S4: Diversification metrics and clade ages of all clades of the seeded plant phylogeny. The first 425 clade numbers refers to tips of the phylogeny as they are listed in Fig S2 from bottom to top. The remainder refer to internal nodes labeled in Fig S2. Families descended from each node are listed in S6 Table.

| Clade Number | Species Richness | Diversification ( $\Omega$ ) | Clade age   | Diversification rate ( $\epsilon=0$ ) | Diversification rate ( $\epsilon=0.9$ ) |
|--------------|------------------|------------------------------|-------------|---------------------------------------|-----------------------------------------|
| 1            | 96               | 4.564348191                  | 69.46613322 | 0.065706093                           | 0.033849232                             |
| 2            | 226              | 5.420534999                  | 69.46613322 | 0.078031333                           | 0.045446612                             |
| 3            | 1                | 0                            | 270.6661112 | 0                                     | 0                                       |
| 4            | 71               | 4.262679877                  | 147.0862728 | 0.028980814                           | 0.014137564                             |
| 5            | 45               | 3.80666249                   | 91.75330086 | 0.041488017                           | 0.018379709                             |
| 6            | 1                | 0                            | 91.75330086 | 0                                     | 0                                       |
| 7            | 266              | 5.583496309                  | 171.1536964 | 0.032622704                           | 0.0193638                               |
| 8            | 41               | 3.713572067                  | 93.84741488 | 0.039570318                           | 0.017149518                             |
| 9            | 199              | 5.293304825                  | 93.84741488 | 0.05640331                            | 0.032339228                             |
| 10           | 1                | 0                            | 101.4737174 | 0                                     | 0                                       |
| 11           | 173              | 5.153291594                  | 64.39035264 | 0.080032045                           | 0.04505988                              |
| 12           | 32               | 3.465735903                  | 64.39035264 | 0.053823838                           | 0.021913018                             |
| 13           | 1                | 0                            | 183.9906694 | 0                                     | 0                                       |
| 14           | 12               | 2.48490665                   | 108.2887884 | 0.022947035                           | 0.00685147                              |
| 15           | 7                | 1.945910149                  | 32.54101524 | 0.059798692                           | 0.014443422                             |
| 16           | 152              | 5.023880521                  | 32.54101524 | 0.154386103                           | 0.085394363                             |
| 17           | 1                | 0                            | 95.85730438 | 0                                     | 0                                       |
| 18           | 5                | 1.609437912                  | 60.43091222 | 0.026632693                           | 0.005567883                             |
| 19           | 85               | 4.442651256                  | 60.43091222 | 0.073516204                           | 0.037078866                             |
| 20           | 84               | 4.430816799                  | 156.9385143 | 0.02823282                            | 0.014209478                             |
| 21           | 23               | 3.135494216                  | 77.26194415 | 0.040582647                           | 0.015054641                             |
| 22           | 70               | 4.248495242                  | 77.26194415 | 0.0549882                             | 0.026751369                             |
| 23           | 1                | 0                            | 71.56365766 | 0                                     | 0                                       |
| 24           | 735              | 6.599870499                  | 26.70065453 | 0.247180102                           | 0.161398888                             |
| 25           | 10               | 2.302585093                  | 26.70065453 | 0.086237028                           | 0.024038882                             |
| 26           | 3962             | 8.284504227                  | 54.26945809 | 0.152655002                           | 0.110268065                             |
| 27           | 8                | 2.079441542                  | 54.26945809 | 0.038316976                           | 0.009777659                             |
| 28           | 517              | 6.248042875                  | 83.02914682 | 0.075251199                           | 0.047726808                             |
| 29           | 271              | 5.602118821                  | 58.26055967 | 0.096156282                           | 0.057194859                             |
| 30           | 2                | 0.693147181                  | 37.80589948 | 0.018334366                           | 0.00252104                              |
| 31           | 1                | 0                            | 37.80589948 | 0                                     | 0                                       |
| 32           | 2776             | 7.928766322                  | 44.12006804 | 0.179708842                           | 0.127593141                             |
| 33           | 3                | 1.098612289                  | 44.12006804 | 0.024900512                           | 0.004132395                             |
| 34           | 11               | 2.397895273                  | 110.6758025 | 0.02166594                            | 0.006262861                             |
| 35           | 63               | 4.143134726                  | 50.98719439 | 0.081258339                           | 0.038717193                             |
| 36           | 1                | 0                            | 27.41756364 | 0                                     | 0                                       |
| 37           | 24               | 3.17805383                   | 27.41756364 | 0.115913065                           | 0.043545899                             |
| 38           | 341              | 5.831882477                  | 61.36531734 | 0.095035481                           | 0.057937418                             |
| 39           | 73               | 4.290459441                  | 59.50581288 | 0.072101518                           | 0.035360145                             |
| 40           | 4082             | 8.314342343                  | 59.50581288 | 0.139723196                           | 0.101065078                             |
| 41           | 2                | 0.693147181                  | 146.1230468 | 0.004743586                           | 0.00065226                              |
| 42           | 4038             | 8.303504799                  | 121.5902694 | 0.068290866                           | 0.049371928                             |
| 43           | 29               | 3.36729583                   | 116.0848847 | 0.029007186                           | 0.011500214                             |
| 44           | 126              | 4.836281907                  | 72.87795312 | 0.066361385                           | 0.035712991                             |
| 45           | 139              | 4.934473933                  | 65.50409114 | 0.075330775                           | 0.041136777                             |

|    |       |             |             |             |             |
|----|-------|-------------|-------------|-------------|-------------|
| 46 | 2     | 0.693147181 | 65.50409114 | 0.010581739 | 0.001455026 |
| 47 | 1     | 0           | 83.91344318 | 0           | 0           |
| 48 | 60    | 4.094344562 | 81.45460816 | 0.050265352 | 0.023712856 |
| 49 | 40    | 3.688879454 | 63.10628787 | 0.058455022 | 0.025183468 |
| 50 | 24    | 3.17805383  | 29.54427129 | 0.107569207 | 0.040411302 |
| 51 | 200   | 5.298317367 | 29.54427129 | 0.179334847 | 0.102887938 |
| 52 | 13    | 2.564949357 | 39.43098218 | 0.065049086 | 0.019995884 |
| 53 | 8     | 2.079441542 | 31.08268764 | 0.066900313 | 0.017071505 |
| 54 | 16    | 2.772588722 | 31.08268764 | 0.089200418 | 0.029479135 |
| 55 | 4     | 1.386294361 | 123.2828768 | 0.011244825 | 0.002128148 |
| 56 | 36    | 3.583518938 | 79.88960117 | 0.044855887 | 0.018826948 |
| 57 | 164   | 5.099866428 | 58.2520937  | 0.087548208 | 0.048937408 |
| 58 | 679   | 6.520621128 | 58.2520937  | 0.11193797  | 0.07263608  |
| 59 | 54    | 3.988984047 | 72.27636303 | 0.055190714 | 0.025465443 |
| 60 | 301   | 5.707110265 | 57.94522597 | 0.098491466 | 0.059262642 |
| 61 | 39    | 3.663561646 | 46.86613174 | 0.078170771 | 0.033470138 |
| 62 | 1075  | 6.980075941 | 31.0238381  | 0.224990729 | 0.1510396   |
| 63 | 250   | 5.521460918 | 31.0238381  | 0.177974785 | 0.104894919 |
| 64 | 186   | 5.225746674 | 81.40692023 | 0.064192905 | 0.036488476 |
| 65 | 1     | 0           | 72.20414823 | 0           | 0           |
| 66 | 290   | 5.669880923 | 51.56199781 | 0.109962398 | 0.065898503 |
| 67 | 273   | 5.609471795 | 51.56199781 | 0.108790816 | 0.064763239 |
| 68 | 6     | 1.791759469 | 58.11601885 | 0.030830733 | 0.006976822 |
| 69 | 2     | 0.693147181 | 58.11601885 | 0.011926956 | 0.001639998 |
| 70 | 276   | 5.620400866 | 40.96980716 | 0.137183972 | 0.081765191 |
| 71 | 778   | 6.656726524 | 40.96980716 | 0.162478835 | 0.106557571 |
| 72 | 27    | 3.295836866 | 33.29937339 | 0.098975942 | 0.038467206 |
| 73 | 4     | 1.386294361 | 33.29937339 | 0.041631245 | 0.007878955 |
| 74 | 28865 | 10.27038507 | 99.03751647 | 0.103701965 | 0.080455488 |
| 75 | 13    | 2.564949357 | 71.73693893 | 0.035754932 | 0.010990954 |
| 76 | 4     | 1.386294361 | 61.73954208 | 0.022453914 | 0.004249534 |
| 77 | 1     | 0           | 45.41440353 | 0           | 0           |
| 78 | 37    | 3.610917913 | 36.28785066 | 0.099507627 | 0.042054194 |
| 79 | 163   | 5.093750201 | 36.28785066 | 0.140370678 | 0.078398399 |
| 80 | 4     | 1.386294361 | 57.63891176 | 0.024051363 | 0.00455186  |
| 81 | 27    | 3.295836866 | 57.63891176 | 0.057180761 | 0.022223422 |
| 82 | 2     | 0.693147181 | 62.24175615 | 0.011136369 | 0.00153129  |
| 83 | 2423  | 7.792761721 | 52.56292137 | 0.148255872 | 0.104520145 |
| 84 | 2     | 0.693147181 | 44.71214548 | 0.015502436 | 0.00213164  |
| 85 | 1338  | 7.198931241 | 34.63425846 | 0.207855793 | 0.141566481 |
| 86 | 2390  | 7.779048645 | 28.58435265 | 0.2721436   | 0.191721052 |
| 87 | 3113  | 8.04334217  | 28.58435265 | 0.281389691 | 0.200936648 |
| 88 | 2658  | 7.885329239 | 104.2134232 | 0.075665197 | 0.053602734 |
| 89 | 17    | 2.833213344 | 101.3244228 | 0.027961801 | 0.009430218 |
| 90 | 757   | 6.629363253 | 63.86283105 | 0.103806285 | 0.067936185 |
| 91 | 10    | 2.302585093 | 63.86283105 | 0.036055168 | 0.010050508 |
| 92 | 6     | 1.791759469 | 70.31951259 | 0.02548026  | 0.00576604  |
| 93 | 104   | 4.644390899 | 55.63986424 | 0.083472362 | 0.043580313 |
| 94 | 34    | 3.526360525 | 55.63986424 | 0.063378309 | 0.026215287 |

|     |       |             |             |             |             |
|-----|-------|-------------|-------------|-------------|-------------|
| 95  | 80    | 4.382026635 | 84.64517243 | 0.051769363 | 0.02582606  |
| 96  | 209   | 5.342334252 | 61.45684466 | 0.086928222 | 0.050147546 |
| 97  | 7     | 1.945910149 | 47.09654494 | 0.041317471 | 0.009979578 |
| 98  | 18    | 2.890371758 | 47.09654494 | 0.061371206 | 0.021089695 |
| 99  | 599   | 6.395261598 | 42.01777229 | 0.152203728 | 0.09775839  |
| 100 | 13    | 2.564949357 | 42.01777229 | 0.061044392 | 0.018764854 |
| 101 | 1636  | 7.400009517 | 48.64758104 | 0.152114645 | 0.104895464 |
| 102 | 142   | 4.955827058 | 48.64758104 | 0.101872014 | 0.055803283 |
| 103 | 68    | 4.219507705 | 79.45485195 | 0.053105727 | 0.025690317 |
| 104 | 3473  | 8.152774053 | 79.45485195 | 0.102608889 | 0.073661669 |
| 105 | 97    | 4.574710979 | 85.12619816 | 0.053740342 | 0.027733577 |
| 106 | 398   | 5.986452005 | 64.07010369 | 0.093435966 | 0.057846451 |
| 107 | 1222  | 7.10824414  | 64.07010369 | 0.110944789 | 0.075120794 |
| 108 | 7     | 1.945910149 | 70.26579216 | 0.027693563 | 0.006688939 |
| 109 | 4     | 1.386294361 | 55.25289739 | 0.025089985 | 0.004748425 |
| 110 | 5987  | 8.697345731 | 36.73914453 | 0.236732397 | 0.174099393 |
| 111 | 528   | 6.269096284 | 36.73914453 | 0.170638058 | 0.108424218 |
| 112 | 12    | 2.48490665  | 58.21149149 | 0.042687562 | 0.012745548 |
| 113 | 37    | 3.610917913 | 34.94601861 | 0.103328449 | 0.04366896  |
| 114 | 487   | 6.188264123 | 34.94601861 | 0.177080662 | 0.111714896 |
| 115 | 5     | 1.609437912 | 60.29531545 | 0.026692586 | 0.005580404 |
| 116 | 12352 | 9.421573272 | 36.80095787 | 0.256014349 | 0.193465522 |
| 117 | 4     | 1.386294361 | 30.9923162  | 0.04473026  | 0.008465462 |
| 118 | 3     | 1.098612289 | 30.9923162  | 0.035447892 | 0.005882799 |
| 119 | 4     | 1.386294361 | 154.3528154 | 0.008981335 | 0.00169977  |
| 120 | 2     | 0.693147181 | 111.7693475 | 0.006201586 | 0.00085274  |
| 121 | 1239  | 7.122059882 | 109.7820287 | 0.064874552 | 0.043966326 |
| 122 | 45    | 3.80666249  | 68.61241685 | 0.055480665 | 0.024578626 |
| 123 | 2     | 0.693147181 | 68.61241685 | 0.010102358 | 0.00138911  |
| 124 | 724   | 6.584791392 | 72.32745354 | 0.091041383 | 0.059376632 |
| 125 | 970   | 6.877296071 | 55.71808816 | 0.123430223 | 0.082270349 |
| 126 | 3820  | 8.248005702 | 55.71808816 | 0.148031025 | 0.10674763  |
| 127 | 202   | 5.308267697 | 141.4286622 | 0.037533182 | 0.021560503 |
| 128 | 5     | 1.609437912 | 102.0936565 | 0.015764328 | 0.003295721 |
| 129 | 10    | 2.302585093 | 81.51934263 | 0.028245874 | 0.007873639 |
| 130 | 2575  | 7.853604813 | 81.51934263 | 0.096340384 | 0.068137311 |
| 131 | 2     | 0.693147181 | 136.2758753 | 0.005086353 | 0.000699391 |
| 132 | 143   | 4.96284463  | 121.9616758 | 0.040691837 | 0.022312709 |
| 133 | 1     | 0           | 121.9616758 | 0           | 0           |
| 134 | 72    | 4.276666119 | 91.57653089 | 0.04670046  | 0.022842797 |
| 135 | 2     | 0.693147181 | 91.57653089 | 0.007569048 | 0.001040771 |
| 136 | 489   | 6.192362489 | 123.4400501 | 0.050164938 | 0.031659214 |
| 137 | 1     | 0           | 38.72539695 | 0           | 0           |
| 138 | 3     | 1.098612289 | 38.72539695 | 0.028369297 | 0.004708062 |
| 139 | 38    | 3.63758616  | 46.25916188 | 0.078634934 | 0.033454184 |
| 140 | 1392  | 7.238496841 | 46.25916188 | 0.156477043 | 0.106840597 |
| 141 | 1401  | 7.244941546 | 47.4416532  | 0.15271267  | 0.104312551 |
| 142 | 16    | 2.772588722 | 42.3710535  | 0.065435917 | 0.021625394 |
| 143 | 67    | 4.204692619 | 42.3710535  | 0.099235027 | 0.047866363 |

|     |      |             |             |             |             |
|-----|------|-------------|-------------|-------------|-------------|
| 144 | 225  | 5.416100402 | 27.14706107 | 0.199509641 | 0.116135445 |
| 145 | 51   | 3.931825633 | 27.14706107 | 0.144834302 | 0.066001968 |
| 146 | 146  | 4.983606622 | 43.45275053 | 0.114690245 | 0.06307633  |
| 147 | 80   | 4.382026635 | 43.45275053 | 0.100845783 | 0.050308697 |
| 148 | 2283 | 7.733245647 | 48.73439127 | 0.158681486 | 0.111514576 |
| 149 | 1175 | 7.069023427 | 48.73439127 | 0.145052051 | 0.09796098  |
| 150 | 194  | 5.267858159 | 68.44719258 | 0.07696237  | 0.043984578 |
| 151 | 151  | 5.017279837 | 63.24196239 | 0.079334664 | 0.043840966 |
| 152 | 1    | 0           | 46.30557918 | 0           | 0           |
| 153 | 22   | 3.091042453 | 24.57317393 | 0.125789304 | 0.046042164 |
| 154 | 5    | 1.609437912 | 24.57317393 | 0.065495728 | 0.013692665 |
| 155 | 3    | 1.098612289 | 89.95950998 | 0.012212297 | 0.002026707 |
| 156 | 5    | 1.609437912 | 84.40816817 | 0.019067324 | 0.003986252 |
| 157 | 8    | 2.079441542 | 32.51759201 | 0.063948202 | 0.01631819  |
| 158 | 2    | 0.693147181 | 32.51759201 | 0.021316067 | 0.002931034 |
| 159 | 2936 | 7.98480339  | 53.1372465  | 0.150267541 | 0.106992352 |
| 160 | 11   | 2.397895273 | 45.37876872 | 0.052841788 | 0.015274702 |
| 161 | 4090 | 8.316300249 | 45.37876872 | 0.183264123 | 0.132571099 |
| 162 | 5    | 1.609437912 | 61.40540184 | 0.026210038 | 0.005479522 |
| 163 | 42   | 3.737669618 | 57.6842953  | 0.064795272 | 0.028244092 |
| 164 | 6    | 1.791759469 | 46.66530212 | 0.038395968 | 0.008688792 |
| 165 | 1    | 0           | 42.39172643 | 0           | 0           |
| 166 | 3586 | 8.184792654 | 35.28304796 | 0.231975215 | 0.166785879 |
| 167 | 8    | 2.079441542 | 33.95061745 | 0.061249005 | 0.015629414 |
| 168 | 88   | 4.477336814 | 28.29835622 | 0.158218971 | 0.080291797 |
| 169 | 645  | 6.469250317 | 23.21757353 | 0.278635935 | 0.180058534 |
| 170 | 3    | 1.098612289 | 23.21757353 | 0.047318135 | 0.00785274  |
| 171 | 165  | 5.105945474 | 47.15959015 | 0.108269505 | 0.060570293 |
| 172 | 20   | 2.995732274 | 36.016016   | 0.083177781 | 0.029562146 |
| 173 | 23   | 3.135494216 | 33.37533608 | 0.093946446 | 0.03485061  |
| 174 | 146  | 4.983606622 | 25.18836367 | 0.197853528 | 0.108813739 |
| 175 | 1    | 0           | 25.18836367 | 0           | 0           |
| 176 | 39   | 3.663561646 | 25.11076395 | 0.145896065 | 0.062467869 |
| 177 | 356  | 5.874930731 | 21.16456282 | 0.277583373 | 0.169968654 |
| 178 | 76   | 4.33073334  | 18.82949723 | 0.22999729  | 0.113654982 |
| 179 | 3839 | 8.252967195 | 18.82949723 | 0.438299923 | 0.316138219 |
| 180 | 24   | 3.17805383  | 90.11029867 | 0.035268486 | 0.013249567 |
| 181 | 131  | 4.875197323 | 69.20748984 | 0.070443204 | 0.038132539 |
| 182 | 396  | 5.981414211 | 38.30421674 | 0.156155502 | 0.0966291   |
| 183 | 336  | 5.81711116  | 38.30421674 | 0.151866078 | 0.092443068 |
| 184 | 1    | 0           | 40.06430664 | 0           | 0           |
| 185 | 4    | 1.386294361 | 40.06430664 | 0.034601731 | 0.006548579 |
| 186 | 1052 | 6.958448393 | 45.84845471 | 0.15177062  | 0.101734771 |
| 187 | 164  | 5.099866428 | 38.17756072 | 0.133582825 | 0.074669687 |
| 188 | 6    | 1.791759469 | 38.17756072 | 0.046932267 | 0.010620508 |
| 189 | 352  | 5.863631176 | 69.45681165 | 0.084421255 | 0.051633422 |
| 190 | 780  | 6.65929392  | 54.06187647 | 0.123179112 | 0.08079966  |
| 191 | 14   | 2.63905733  | 54.06187647 | 0.048815496 | 0.015406589 |
| 192 | 1393 | 7.239214974 | 59.1429713  | 0.122401949 | 0.083578317 |

|     |       |             |             |             |             |
|-----|-------|-------------|-------------|-------------|-------------|
| 193 | 784   | 6.66440902  | 53.01380031 | 0.125710833 | 0.082492447 |
| 194 | 3820  | 8.248005702 | 53.01380031 | 0.155582238 | 0.112192935 |
| 195 | 3     | 1.098612289 | 48.4131207  | 0.022692449 | 0.003765953 |
| 196 | 570   | 6.345636361 | 48.4131207  | 0.131072657 | 0.08383507  |
| 197 | 420   | 6.040254711 | 51.09676776 | 0.11821207  | 0.073563789 |
| 198 | 183   | 5.209486153 | 40.92741867 | 0.127285969 | 0.072198794 |
| 199 | 19    | 2.944438979 | 40.92741867 | 0.071942944 | 0.025157204 |
| 200 | 83    | 4.418840608 | 39.34976292 | 0.112296499 | 0.056396871 |
| 201 | 314   | 5.749392986 | 30.89706989 | 0.186082143 | 0.112472388 |
| 202 | 2     | 0.693147181 | 30.89706989 | 0.022434075 | 0.003084764 |
| 203 | 92    | 4.521788577 | 38.74572292 | 0.1167042   | 0.059684921 |
| 204 | 9     | 2.197224577 | 31.71964293 | 0.069270155 | 0.018530684 |
| 205 | 5240  | 8.564076777 | 31.71964293 | 0.269992849 | 0.197455179 |
| 206 | 3     | 1.098612289 | 21.52140876 | 0.051047415 | 0.008471637 |
| 207 | 487   | 6.188264123 | 21.52140876 | 0.287539919 | 0.181400338 |
| 208 | 73    | 4.290459441 | 72.8173673  | 0.058920826 | 0.028896048 |
| 209 | 54    | 3.988984047 | 72.8173673  | 0.054780668 | 0.025276245 |
| 210 | 5     | 1.609437912 | 52.89809041 | 0.030425255 | 0.006360763 |
| 211 | 4     | 1.386294361 | 39.47764401 | 0.035115934 | 0.006645895 |
| 212 | 747   | 6.616065185 | 39.47764401 | 0.167590173 | 0.109567235 |
| 213 | 13    | 2.564949357 | 52.99281432 | 0.048401833 | 0.014878571 |
| 214 | 15    | 2.708050201 | 46.40529147 | 0.058356496 | 0.018865709 |
| 215 | 2490  | 7.820037989 | 46.40529147 | 0.168516084 | 0.118974812 |
| 216 | 105   | 4.65396035  | 40.3541869  | 0.115327819 | 0.060306341 |
| 217 | 552   | 6.313548046 | 26.09851914 | 0.241912118 | 0.154305146 |
| 218 | 23600 | 10.06900199 | 18.7485456  | 0.537055098 | 0.41426137  |
| 219 | 63    | 4.143134726 | 18.7485456  | 0.220984327 | 0.105292489 |
| 220 | 108   | 4.682131227 | 44.88659997 | 0.104310222 | 0.054795615 |
| 221 | 11    | 2.397895273 | 39.35494311 | 0.060929964 | 0.01761271  |
| 222 | 25    | 3.218875825 | 36.20172252 | 0.088914991 | 0.033804343 |
| 223 | 12    | 2.48490665  | 36.20172252 | 0.068640564 | 0.020494532 |
| 224 | 94    | 4.543294782 | 68.97657865 | 0.06586721  | 0.033810664 |
| 225 | 119   | 4.779123493 | 54.35403377 | 0.087925829 | 0.046904434 |
| 226 | 8     | 2.079441542 | 54.35403377 | 0.038257355 | 0.009762445 |
| 227 | 35    | 3.555348061 | 56.5273999  | 0.062896013 | 0.026210378 |
| 228 | 340   | 5.828945618 | 41.4090794  | 0.140764917 | 0.085790046 |
| 229 | 1641  | 7.403061091 | 41.4090794  | 0.178778693 | 0.123304974 |
| 230 | 2     | 0.693147181 | 55.14896474 | 0.012568634 | 0.001728232 |
| 231 | 9     | 2.197224577 | 42.02321871 | 0.052285966 | 0.013987188 |
| 232 | 7     | 1.945910149 | 38.76819514 | 0.050193468 | 0.012123433 |
| 233 | 332   | 5.805134969 | 29.49326182 | 0.196829195 | 0.119664532 |
| 234 | 1705  | 7.44132039  | 26.71643709 | 0.278529669 | 0.192540644 |
| 235 | 15    | 2.708050201 | 23.11323333 | 0.11716449  | 0.037877381 |
| 236 | 5149  | 8.5465578   | 23.11323333 | 0.369769027 | 0.270222647 |
| 237 | 5     | 1.609437912 | 56.21409749 | 0.028630503 | 0.005985549 |
| 238 | 4     | 1.386294361 | 56.21409749 | 0.024660973 | 0.004667233 |
| 239 | 27    | 3.295836866 | 59.77041294 | 0.055141611 | 0.021430902 |
| 240 | 1     | 0           | 59.77041294 | 0           | 0           |
| 241 | 253   | 5.533389489 | 86.84515388 | 0.063715582 | 0.037604394 |

|     |       |             |             |             |             |
|-----|-------|-------------|-------------|-------------|-------------|
| 242 | 7     | 1.945910149 | 75.04243147 | 0.025930798 | 0.006263172 |
| 243 | 14259 | 9.565143565 | 56.05093645 | 0.170650915 | 0.129581947 |
| 244 | 2178  | 7.686162303 | 43.53689729 | 0.17654364  | 0.123750227 |
| 245 | 579   | 6.361302478 | 40.34720521 | 0.157664018 | 0.100977052 |
| 246 | 17    | 2.833213344 | 34.07473993 | 0.083147028 | 0.028041636 |
| 247 | 7038  | 8.859079318 | 34.07473993 | 0.259989639 | 0.192452597 |
| 248 | 4325  | 8.372167419 | 68.07149626 | 0.122990795 | 0.089195352 |
| 249 | 2695  | 7.899153483 | 37.46164995 | 0.210859732 | 0.149483601 |
| 250 | 4268  | 8.358900612 | 37.46164995 | 0.223132207 | 0.16172331  |
| 251 | 5     | 1.609437912 | 47.51365862 | 0.033873163 | 0.00708159  |
| 252 | 18    | 2.890371758 | 35.08539267 | 0.082381058 | 0.028309553 |
| 253 | 2     | 0.693147181 | 35.08539267 | 0.019756005 | 0.00271652  |
| 254 | 1     | 0           | 55.32507879 | 0           | 0           |
| 255 | 717   | 6.575075841 | 35.74838138 | 0.183926533 | 0.119864586 |
| 256 | 6     | 1.791759469 | 35.74838138 | 0.050121415 | 0.011342195 |
| 257 | 4     | 1.386294361 | 46.82677449 | 0.029604737 | 0.005602869 |
| 258 | 302   | 5.710427017 | 33.09403361 | 0.172551557 | 0.103861858 |
| 259 | 4074  | 8.312380597 | 33.09403361 | 0.251174598 | 0.181664232 |
| 260 | 3159  | 8.058010801 | 38.66758793 | 0.208391866 | 0.148917245 |
| 261 | 3032  | 8.016977747 | 36.031762   | 0.222497522 | 0.158675465 |
| 262 | 41    | 3.713572067 | 34.42610025 | 0.107870832 | 0.046750515 |
| 263 | 8444  | 9.041211409 | 29.43772786 | 0.30713007  | 0.228947412 |
| 264 | 341   | 5.831882477 | 26.8783969  | 0.216972854 | 0.132275302 |
| 265 | 2850  | 7.955074273 | 22.11300146 | 0.359746473 | 0.255760943 |
| 266 | 27    | 3.295836866 | 22.11300146 | 0.149045206 | 0.057926729 |
| 267 | 6     | 1.791759469 | 27.8604465  | 0.064311944 | 0.014553432 |
| 268 | 1109  | 7.011213987 | 27.8604465  | 0.25165476  | 0.169297773 |
| 269 | 935   | 6.840546529 | 24.07699975 | 0.284111251 | 0.188874906 |
| 270 | 47    | 3.850147602 | 24.07699975 | 0.159909775 | 0.071552378 |
| 271 | 31    | 3.433987204 | 25.57586631 | 0.134266701 | 0.054203222 |
| 272 | 329   | 5.796057751 | 21.35020187 | 0.271475548 | 0.164891219 |
| 273 | 7     | 1.945910149 | 21.35020187 | 0.091142471 | 0.022014013 |
| 274 | 392   | 5.97126184  | 25.91840832 | 0.230386904 | 0.142422956 |
| 275 | 118   | 4.770684624 | 21.69623831 | 0.219885335 | 0.117144823 |
| 276 | 6625  | 8.798605651 | 21.69623831 | 0.405535998 | 0.29947026  |
| 277 | 11    | 2.397895273 | 92.397749   | 0.02595188  | 0.007501776 |
| 278 | 39    | 3.663561646 | 80.5354586  | 0.045490045 | 0.019477333 |
| 279 | 21    | 3.044522438 | 63.45600354 | 0.047978477 | 0.017312976 |
| 280 | 135   | 4.905274778 | 60.00476455 | 0.081748088 | 0.044450274 |
| 281 | 3     | 1.098612289 | 50.30397822 | 0.021839471 | 0.003624396 |
| 282 | 35    | 3.555348061 | 50.30397822 | 0.070677274 | 0.029453029 |
| 283 | 27    | 3.295836866 | 58.32187766 | 0.056511158 | 0.021963179 |
| 284 | 388   | 5.96100534  | 43.89518444 | 0.135800895 | 0.083866858 |
| 285 | 1264  | 7.142036575 | 43.89518444 | 0.162706608 | 0.110411804 |
| 286 | 2161  | 7.678326357 | 64.60988223 | 0.118841361 | 0.083267407 |
| 287 | 2     | 0.693147181 | 50.46503923 | 0.013735196 | 0.001888638 |
| 288 | 1     | 0           | 41.17369306 | 0           | 0           |
| 289 | 3     | 1.098612289 | 30.46349668 | 0.036063237 | 0.005984919 |
| 290 | 169   | 5.129898715 | 30.46349668 | 0.168394941 | 0.094513065 |

|     |      |             |             |             |             |
|-----|------|-------------|-------------|-------------|-------------|
| 291 | 1330 | 7.192934221 | 121.8333858 | 0.059039106 | 0.040195003 |
| 292 | 1855 | 7.525639975 | 96.7590816  | 0.077777092 | 0.054030018 |
| 293 | 21   | 3.044522438 | 74.33677564 | 0.040955804 | 0.014778853 |
| 294 | 29   | 3.36729583  | 74.33677564 | 0.045297846 | 0.017958824 |
| 295 | 731  | 6.59441346  | 90.68547453 | 0.072717417 | 0.047461461 |
| 296 | 1172 | 7.06646697  | 57.36727515 | 0.123179408 | 0.08317515  |
| 297 | 854  | 6.749931194 | 57.36727515 | 0.117661701 | 0.077706839 |
| 298 | 6212 | 8.734238184 | 64.54022351 | 0.135330151 | 0.099675838 |
| 299 | 267  | 5.587248658 | 64.54022351 | 0.086570023 | 0.051406946 |
| 300 | 7717 | 8.951180966 | 55.70918397 | 0.160676936 | 0.119365623 |
| 301 | 10   | 2.302585093 | 29.63617172 | 0.077695092 | 0.021657787 |
| 302 | 1    | 0           | 21.59023683 | 0           | 0           |
| 303 | 90   | 4.49980967  | 21.59023683 | 0.208418727 | 0.106183863 |
| 304 | 2    | 0.693147181 | 60.56477709 | 0.011444724 | 0.00157369  |
| 305 | 2    | 0.693147181 | 41.98187106 | 0.016510631 | 0.00227027  |
| 306 | 3    | 1.098612289 | 41.98187106 | 0.026168731 | 0.004342864 |
| 307 | 52   | 3.951243719 | 27.40961875 | 0.14415537  | 0.065972781 |
| 308 | 1    | 0           | 20.30628641 | 0           | 0           |
| 309 | 11   | 2.397895273 | 17.33899053 | 0.138294976 | 0.039976213 |
| 310 | 9    | 2.197224577 | 17.33899053 | 0.126721597 | 0.033899705 |
| 311 | 61   | 4.110873864 | 108.2001612 | 0.037993232 | 0.017984355 |
| 312 | 5    | 1.609437912 | 70.4687758  | 0.022839022 | 0.004774771 |
| 313 | 17   | 2.833213344 | 66.33263859 | 0.042712206 | 0.014404846 |
| 314 | 9    | 2.197224577 | 58.84244515 | 0.03734081  | 0.009989161 |
| 315 | 1414 | 7.254177846 | 51.69179354 | 0.140335193 | 0.095913435 |
| 316 | 804  | 6.689599269 | 51.69179354 | 0.129413178 | 0.085084028 |
| 317 | 2582 | 7.856319571 | 61.72184359 | 0.127285886 | 0.090036424 |
| 318 | 846  | 6.74051936  | 51.86289514 | 0.12996805  | 0.085774548 |
| 319 | 2649 | 7.881937489 | 46.26815691 | 0.170353392 | 0.120660612 |
| 320 | 177  | 5.176149733 | 46.26815691 | 0.111872832 | 0.063178691 |
| 321 | 2    | 0.693147181 | 86.0878453  | 0.008051627 | 0.001107127 |
| 322 | 23   | 3.135494216 | 75.70680712 | 0.041416279 | 0.015363887 |
| 323 | 6    | 1.791759469 | 75.70680712 | 0.023667085 | 0.005355729 |
| 324 | 8    | 2.079441542 | 71.5154189  | 0.029076828 | 0.007419774 |
| 325 | 1189 | 7.080867897 | 67.31784726 | 0.105185596 | 0.07109294  |
| 326 | 6711 | 8.81150325  | 56.57416497 | 0.155751362 | 0.115074758 |
| 327 | 12   | 2.48490665  | 39.74401226 | 0.062522793 | 0.018667902 |
| 328 | 4    | 1.386294361 | 39.74401226 | 0.034880584 | 0.006601353 |
| 329 | 22   | 3.091042453 | 60.36405779 | 0.051206671 | 0.018742976 |
| 330 | 25   | 3.218875825 | 55.24376474 | 0.058266772 | 0.022152282 |
| 331 | 413  | 6.023447593 | 35.31651188 | 0.17055613  | 0.105968003 |
| 332 | 73   | 4.290459441 | 25.99998577 | 0.165017761 | 0.080928281 |
| 333 | 472  | 6.156978986 | 25.99998577 | 0.236807014 | 0.148972473 |
| 334 | 2    | 0.693147181 | 36.70208877 | 0.018885769 | 0.00259686  |
| 335 | 123  | 4.812184355 | 36.70208877 | 0.131114727 | 0.070301634 |
| 336 | 52   | 3.951243719 | 55.60565231 | 0.071058311 | 0.032519873 |
| 337 | 36   | 3.583518938 | 55.60565231 | 0.064445228 | 0.027049002 |
| 338 | 1    | 0           | 69.17505053 | 0           | 0           |
| 339 | 12   | 2.48490665  | 67.78398342 | 0.036659201 | 0.010945614 |

|     |       |             |             |             |             |
|-----|-------|-------------|-------------|-------------|-------------|
| 340 | 2     | 0.693147181 | 53.92462586 | 0.012854001 | 0.00176747  |
| 341 | 4     | 1.386294361 | 29.09009266 | 0.047655206 | 0.009019025 |
| 342 | 19    | 2.944438979 | 29.09009266 | 0.101217931 | 0.035394161 |
| 343 | 1     | 0           | 57.32766188 | 0           | 0           |
| 344 | 23    | 3.135494216 | 35.56950704 | 0.088151186 | 0.032700785 |
| 345 | 102   | 4.624972813 | 35.56950704 | 0.13002634  | 0.067668779 |
| 346 | 2     | 0.693147181 | 46.02151982 | 0.015061371 | 0.002070992 |
| 347 | 1     | 0           | 42.42999797 | 0           | 0           |
| 348 | 565   | 6.336825731 | 30.37465458 | 0.20862215  | 0.133336308 |
| 349 | 331   | 5.802118375 | 22.12653817 | 0.262224408 | 0.159372447 |
| 350 | 4901  | 8.497194545 | 22.12653817 | 0.384027292 | 0.280045802 |
| 351 | 385   | 5.953243334 | 72.15595889 | 0.082505221 | 0.05091424  |
| 352 | 26    | 3.258096538 | 72.15595889 | 0.045153534 | 0.017361878 |
| 353 | 7     | 1.945910149 | 64.66495955 | 0.030092188 | 0.007268289 |
| 354 | 19400 | 9.873028345 | 59.36417161 | 0.166312914 | 0.127533272 |
| 355 | 7     | 1.945910149 | 52.06108713 | 0.03737744  | 0.009027926 |
| 356 | 1911  | 7.555381944 | 52.06108713 | 0.14512532  | 0.100987045 |
| 357 | 1     | 0           | 94.19025976 | 0           | 0           |
| 358 | 11742 | 9.370927437 | 83.26822135 | 0.112539061 | 0.084895635 |
| 359 | 1     | 0           | 59.74829742 | 0           | 0           |
| 360 | 130   | 4.86753445  | 57.78109636 | 0.08424095  | 0.045549306 |
| 361 | 1470  | 7.29301768  | 51.96651307 | 0.140340717 | 0.096149156 |
| 362 | 2     | 0.693147181 | 51.96651307 | 0.013338343 | 0.001834069 |
| 363 | 114   | 4.736198448 | 56.54550558 | 0.083759061 | 0.04438194  |
| 364 | 134   | 4.8978398   | 44.20983027 | 0.110786216 | 0.060173485 |
| 365 | 1448  | 7.277938573 | 34.52038815 | 0.210830149 | 0.144307465 |
| 366 | 2437  | 7.798523054 | 34.52038815 | 0.225910642 | 0.159315249 |
| 367 | 16    | 2.772588722 | 38.66157524 | 0.071714324 | 0.023700295 |
| 368 | 5     | 1.609437912 | 38.66157524 | 0.041628876 | 0.008703014 |
| 369 | 1357  | 7.21303166  | 52.84296866 | 0.136499365 | 0.093050354 |
| 370 | 3     | 1.098612289 | 40.80701748 | 0.026922141 | 0.004467897 |
| 371 | 1738  | 7.460490306 | 36.02418333 | 0.207096723 | 0.143322339 |
| 372 | 2     | 0.693147181 | 36.02418333 | 0.019241163 | 0.002645728 |
| 373 | 30    | 3.401197382 | 23.47978585 | 0.144856406 | 0.057963755 |
| 374 | 45    | 3.80666249  | 23.47978585 | 0.162125094 | 0.071823438 |
| 375 | 41    | 3.713572067 | 80.68147562 | 0.046027568 | 0.019948048 |
| 376 | 1162  | 7.057897937 | 58.01908573 | 0.121647865 | 0.082094163 |
| 377 | 93    | 4.532599493 | 28.53900197 | 0.158821233 | 0.081375926 |
| 378 | 154   | 5.036952602 | 28.53900197 | 0.176493649 | 0.097801777 |
| 379 | 93    | 4.532599493 | 32.80662519 | 0.138161102 | 0.070790205 |
| 380 | 1     | 0           | 22.48036981 | 0           | 0           |
| 381 | 264   | 5.575949103 | 22.48036981 | 0.24803636  | 0.147101081 |
| 382 | 2     | 0.693147181 | 61.49658681 | 0.011271311 | 0.001549845 |
| 383 | 1770  | 7.478734826 | 61.49658681 | 0.121612194 | 0.084252182 |
| 384 | 6     | 1.791759469 | 98.37378718 | 0.01821379  | 0.004121678 |
| 385 | 355   | 5.872117789 | 36.87783781 | 0.159231618 | 0.09747233  |
| 386 | 871   | 6.769641977 | 36.87783781 | 0.183569384 | 0.12140996  |
| 387 | 450   | 6.109247583 | 47.42032316 | 0.128831842 | 0.080692515 |
| 388 | 826   | 6.716594774 | 42.26728324 | 0.158907653 | 0.104687273 |



|     |        |             |             |             |             |
|-----|--------|-------------|-------------|-------------|-------------|
| 389 | 66     | 4.189654742 | 38.12295386 | 0.109898482 | 0.052852752 |
| 390 | 1      | 0           | 38.12295386 | 0           | 0           |
| 391 | 2      | 0.693147181 | 93.98401306 | 0.00737516  | 0.001014111 |
| 392 | 290    | 5.669880923 | 59.47115289 | 0.095338339 | 0.057134566 |
| 393 | 185    | 5.220355825 | 59.47115289 | 0.08777963  | 0.049860696 |
| 394 | 1621   | 7.390798522 | 66.94787269 | 0.110396316 | 0.076085318 |
| 395 | 70     | 4.248495242 | 66.94787269 | 0.06345975  | 0.030872717 |
| 396 | 391    | 5.96870756  | 94.91358957 | 0.0628857   | 0.038865662 |
| 397 | 50     | 3.912023005 | 71.30645572 | 0.054862115 | 0.024891889 |
| 398 | 1301   | 7.170888479 | 71.30645572 | 0.100564366 | 0.068369649 |
| 399 | 246    | 5.505331536 | 87.05739757 | 0.063237952 | 0.037201646 |
| 400 | 739    | 6.605297921 | 59.63795857 | 0.110756607 | 0.072350194 |
| 401 | 403    | 5.998936562 | 59.63795857 | 0.100589234 | 0.062350193 |
| 402 | 10     | 2.302585093 | 84.33848877 | 0.027301712 | 0.00761045  |
| 403 | 6742   | 8.816111896 | 29.39891229 | 0.299878846 | 0.221602104 |
| 404 | 37     | 3.610917913 | 29.39891229 | 0.122824881 | 0.051908597 |
| 405 | 2171   | 7.68294317  | 68.98940841 | 0.111364097 | 0.078048141 |
| 406 | 101    | 4.615120517 | 68.98940841 | 0.066896073 | 0.034757441 |
| 407 | 9      | 2.197224577 | 64.9310724  | 0.033839339 | 0.009052471 |
| 408 | 42     | 3.737669618 | 39.22176812 | 0.095295796 | 0.041539192 |
| 409 | 215    | 5.370638028 | 39.22176812 | 0.136930034 | 0.079268761 |
| 410 | 546    | 6.302618976 | 31.29664505 | 0.201383214 | 0.128332702 |
| 411 | 5      | 1.609437912 | 31.29664505 | 0.051425254 | 0.010751064 |
| 412 | 220    | 5.393627546 | 49.82199646 | 0.108257957 | 0.062846476 |
| 413 | 2      | 0.693147181 | 49.82199646 | 0.013912473 | 0.001913014 |
| 414 | 19     | 2.944438979 | 60.41071379 | 0.048740344 | 0.017043656 |
| 415 | 75     | 4.317488114 | 60.41071379 | 0.071468914 | 0.035229375 |
| 416 | 11     | 2.397895273 | 67.84910246 | 0.035341592 | 0.010216011 |
| 417 | 27     | 3.295836866 | 67.84910246 | 0.048575983 | 0.018879157 |
| 418 | 1033   | 6.940222469 | 72.31582925 | 0.095971    | 0.064250278 |
| 419 | 46     | 3.828641396 | 65.71780396 | 0.058258815 | 0.02594043  |
| 420 | 203    | 5.313205979 | 59.30228081 | 0.089595306 | 0.051498882 |
| 421 | 1780   | 7.484368643 | 46.71479691 | 0.160214089 | 0.111031779 |
| 422 | 1217   | 7.104144093 | 46.71479691 | 0.152074815 | 0.102942265 |
| 423 | 2      | 0.693147181 | 55.58551727 | 0.012469924 | 0.001714659 |
| 424 | 17     | 2.833213344 | 42.77816192 | 0.066230367 | 0.022336431 |
| 425 | 2181   | 7.687538766 | 42.77816192 | 0.179707085 | 0.125977169 |
| 426 | 367831 | 12.81537887 | NA          | NA          | NA          |
| 427 | 1152   | 7.049254841 | 326.6565196 | 0.021580022 | 0.014554897 |
| 428 | 322    | 5.774551546 | 292.8599401 | 0.019717793 | 0.011949512 |
| 429 | 830    | 6.721425701 | 292.8599401 | 0.02295099  | 0.015125406 |
| 430 | 829    | 6.720220155 | 270.6661112 | 0.024828451 | 0.016361239 |
| 431 | 117    | 4.762173935 | 226.9311016 | 0.020985109 | 0.011165049 |
| 432 | 46     | 3.828641396 | 147.0862728 | 0.026029903 | 0.011590124 |
| 433 | 712    | 6.568077911 | 226.9311016 | 0.028943049 | 0.018851775 |
| 434 | 446    | 6.100318952 | 171.1536964 | 0.035642344 | 0.022305754 |
| 435 | 240    | 5.480638923 | 125.4437612 | 0.043690008 | 0.025627961 |
| 436 | 206    | 5.327876169 | 125.4437612 | 0.042472229 | 0.024457597 |
| 437 | 205    | 5.323009979 | 101.4737174 | 0.052457031 | 0.030189009 |

|     |        |             |             |             |             |
|-----|--------|-------------|-------------|-------------|-------------|
| 438 | 366679 | 12.81224208 | 326.6565196 | 0.039222368 | 0.032173494 |
| 439 | 366678 | 12.81223936 | 183.9906694 | 0.069635267 | 0.057120716 |
| 440 | 171    | 5.141663557 | 178.132937  | 0.028864193 | 0.016225925 |
| 441 | 159    | 5.068904202 | 108.2887884 | 0.046809132 | 0.02605421  |
| 442 | 366507 | 12.8117729  | 178.132937  | 0.071922538 | 0.058996458 |
| 443 | 91     | 4.510859507 | 169.526009  | 0.026608657 | 0.013582489 |
| 444 | 90     | 4.49980967  | 95.85730438 | 0.046942794 | 0.02391612  |
| 445 | 366416 | 12.81152458 | 169.526009  | 0.07557262  | 0.061990276 |
| 446 | 13058  | 9.477156252 | 160.7745018 | 0.058946886 | 0.044629342 |
| 447 | 12974  | 9.470702634 | 156.9385143 | 0.06034658  | 0.045679106 |
| 448 | 4809   | 8.478244441 | 133.6778177 | 0.063422972 | 0.046212073 |
| 449 | 93     | 4.532599493 | 124.7712083 | 0.036327287 | 0.01861317  |
| 450 | 4716   | 8.458716262 | 124.7712083 | 0.067793815 | 0.049354637 |
| 451 | 746    | 6.6147256   | 102.6728017 | 0.064425296 | 0.042115659 |
| 452 | 745    | 6.613384218 | 71.56365766 | 0.092412608 | 0.060405063 |
| 453 | 3970   | 8.286521374 | 102.6728017 | 0.080708048 | 0.058303666 |
| 454 | 8165   | 9.007612005 | 133.6778177 | 0.067382997 | 0.050166353 |
| 455 | 3570   | 8.180320875 | 124.2160072 | 0.06585561  | 0.047338936 |
| 456 | 3053   | 8.023879993 | 83.02914682 | 0.096639316 | 0.068942518 |
| 457 | 2782   | 7.930925372 | 58.26055967 | 0.136128548 | 0.096661793 |
| 458 | 3      | 1.098612289 | 55.88455912 | 0.019658602 | 0.003262467 |
| 459 | 2779   | 7.92984643  | 55.88455912 | 0.141896913 | 0.100752243 |
| 460 | 4595   | 8.432724035 | 124.2160072 | 0.067887579 | 0.049366389 |
| 461 | 4584   | 8.430327258 | 110.6758025 | 0.076171368 | 0.055384316 |
| 462 | 88     | 4.477336814 | 75.14568721 | 0.059582086 | 0.030236278 |
| 463 | 25     | 3.218875825 | 50.98719439 | 0.063131064 | 0.024001623 |
| 464 | 4496   | 8.410943392 | 75.14568721 | 0.111928491 | 0.08131349  |
| 465 | 4155   | 8.332067707 | 61.36531734 | 0.135778125 | 0.098290803 |
| 466 | 353358 | 12.77523699 | 160.7745018 | 0.079460591 | 0.06513892  |
| 467 | 78499  | 11.27084116 | 159.715531  | 0.070568223 | 0.056152152 |
| 468 | 78497  | 11.27081569 | 146.1230468 | 0.077132362 | 0.061375296 |
| 469 | 4696   | 8.454466362 | 135.5066609 | 0.062391519 | 0.045413236 |
| 470 | 658    | 6.489204931 | 121.5902694 | 0.053369443 | 0.034543923 |
| 471 | 629    | 6.444131257 | 116.0848847 | 0.055512234 | 0.035799262 |
| 472 | 267    | 5.587248658 | 94.63660583 | 0.05903898  | 0.035058482 |
| 473 | 141    | 4.94875989  | 72.87795312 | 0.06790476  | 0.037158703 |
| 474 | 362    | 5.891644212 | 94.63660583 | 0.062255447 | 0.038184135 |
| 475 | 361    | 5.888877958 | 83.91344318 | 0.070178004 | 0.043031459 |
| 476 | 301    | 5.707110265 | 81.45460816 | 0.070064916 | 0.042158293 |
| 477 | 261    | 5.564520407 | 63.10628787 | 0.088176957 | 0.052226759 |
| 478 | 224    | 5.411646052 | 56.68156248 | 0.095474539 | 0.05554634  |
| 479 | 37     | 3.610917913 | 56.68156248 | 0.063705335 | 0.026923328 |
| 480 | 24     | 3.17805383  | 39.43098218 | 0.080597887 | 0.030278791 |
| 481 | 73801  | 11.20912756 | 135.5066609 | 0.082720122 | 0.06572861  |
| 482 | 73797  | 11.20907336 | 123.2828768 | 0.090921575 | 0.072245315 |
| 483 | 2598   | 7.862497197 | 118.1310528 | 0.066557412 | 0.047094902 |
| 484 | 879    | 6.778784898 | 92.92772551 | 0.07294685  | 0.048278236 |
| 485 | 843    | 6.736966958 | 79.88960117 | 0.084328459 | 0.055639299 |
| 486 | 1719   | 7.449498005 | 92.92772551 | 0.080164428 | 0.055442386 |

|     |       |             |             |             |             |
|-----|-------|-------------|-------------|-------------|-------------|
| 487 | 1665  | 7.417580402 | 72.27636303 | 0.102628025 | 0.070844546 |
| 488 | 1364  | 7.218176838 | 57.94522597 | 0.124568965 | 0.084945191 |
| 489 | 1325  | 7.189167738 | 46.86613174 | 0.153397933 | 0.104411266 |
| 490 | 71199 | 11.17323405 | 118.1310528 | 0.094583378 | 0.075092663 |
| 491 | 1843  | 7.519149958 | 115.5037443 | 0.065098755 | 0.045205775 |
| 492 | 1812  | 7.502186487 | 96.58717913 | 0.077672695 | 0.053884543 |
| 493 | 750   | 6.620073207 | 87.01980565 | 0.076075477 | 0.049752084 |
| 494 | 564   | 6.335054251 | 81.40692023 | 0.077819603 | 0.049729195 |
| 495 | 563   | 6.333279628 | 72.20414823 | 0.087713515 | 0.056043233 |
| 496 | 1062  | 6.967909202 | 87.01980565 | 0.080072682 | 0.053709187 |
| 497 | 8     | 2.079441542 | 62.55057844 | 0.033244162 | 0.008483187 |
| 498 | 1054  | 6.960347729 | 62.55057844 | 0.111275513 | 0.074599874 |
| 499 | 31    | 3.433987204 | 96.58717913 | 0.03555324  | 0.014352778 |
| 500 | 69356 | 11.14700794 | 115.5037443 | 0.096507763 | 0.076573731 |
| 501 | 38382 | 10.55534388 | 112.0012477 | 0.094243092 | 0.073686619 |
| 502 | 9517  | 9.160834952 | 99.03751647 | 0.092498634 | 0.069258553 |
| 503 | 218   | 5.384495063 | 85.72188701 | 0.062813539 | 0.036424361 |
| 504 | 205   | 5.323009979 | 71.73693893 | 0.0742018   | 0.042703117 |
| 505 | 201   | 5.303304908 | 61.73954208 | 0.085898028 | 0.049312359 |
| 506 | 200   | 5.298317367 | 45.41440353 | 0.116666012 | 0.066933592 |
| 507 | 9299  | 9.137662146 | 85.72188701 | 0.106596605 | 0.07974678  |
| 508 | 31    | 3.433987204 | 65.24259678 | 0.052634128 | 0.021248301 |
| 509 | 9268  | 9.134322886 | 65.24259678 | 0.140005508 | 0.10472772  |
| 510 | 9266  | 9.134107066 | 62.24175615 | 0.146752078 | 0.109773458 |
| 511 | 6843  | 8.830981511 | 52.56292137 | 0.168007814 | 0.124226557 |
| 512 | 6841  | 8.830689199 | 44.71214548 | 0.197500905 | 0.146032331 |
| 513 | 5503  | 8.613048677 | 34.63425846 | 0.248685812 | 0.182250119 |
| 514 | 30974 | 10.34090342 | 112.0012477 | 0.092328466 | 0.071772494 |
| 515 | 6290  | 8.74671635  | 106.6664132 | 0.082000661 | 0.060427279 |
| 516 | 3632  | 8.19753874  | 104.2134232 | 0.078661064 | 0.056589913 |
| 517 | 3615  | 8.192847135 | 101.3244228 | 0.080857575 | 0.058157238 |
| 518 | 911   | 6.814542897 | 93.73385123 | 0.072700981 | 0.048240721 |
| 519 | 767   | 6.642486801 | 76.13363142 | 0.087247734 | 0.057156967 |
| 520 | 144   | 4.9698133   | 76.13363142 | 0.065277502 | 0.035829801 |
| 521 | 138   | 4.927253685 | 70.31951259 | 0.070069508 | 0.038223352 |
| 522 | 2704  | 7.902487437 | 93.73385123 | 0.084307722 | 0.059778033 |
| 523 | 2624  | 7.87245515  | 84.64517243 | 0.093005365 | 0.065843023 |
| 524 | 234   | 5.455321115 | 74.24830709 | 0.073474013 | 0.042970358 |
| 525 | 25    | 3.218875825 | 61.45684466 | 0.052376197 | 0.019912761 |
| 526 | 2390  | 7.779048645 | 74.24830709 | 0.104770721 | 0.073809389 |
| 527 | 612   | 6.416732283 | 57.54179965 | 0.111514279 | 0.071752118 |
| 528 | 1778  | 7.483244416 | 57.54179965 | 0.130048842 | 0.09012072  |
| 529 | 24684 | 10.11391054 | 106.6664132 | 0.094818137 | 0.073234768 |
| 530 | 3541  | 8.172164452 | 90.28384342 | 0.090516355 | 0.065040627 |
| 531 | 21143 | 9.95906416  | 90.28384342 | 0.110308376 | 0.084809246 |
| 532 | 21046 | 9.954465797 | 85.12619816 | 0.116937747 | 0.089893692 |
| 533 | 8146  | 9.005282288 | 81.88874469 | 0.10996972  | 0.081864748 |
| 534 | 1620  | 7.390181428 | 75.20982402 | 0.098260853 | 0.067719032 |
| 535 | 6526  | 8.783549477 | 75.20982402 | 0.116787263 | 0.086190104 |

|     |        |             |             |             |             |
|-----|--------|-------------|-------------|-------------|-------------|
| 536 | 6519   | 8.782476269 | 70.26579216 | 0.124989358 | 0.092239347 |
| 537 | 6515   | 8.78186249  | 55.25289739 | 0.158939402 | 0.117290824 |
| 538 | 12900  | 9.46498259  | 81.88874469 | 0.115583437 | 0.087473498 |
| 539 | 536    | 6.284134161 | 69.84971916 | 0.089966491 | 0.05724004  |
| 540 | 524    | 6.261491684 | 58.21149149 | 0.107564529 | 0.068301571 |
| 541 | 12364  | 9.422544303 | 69.84971916 | 0.134897383 | 0.101942956 |
| 542 | 12359  | 9.422139822 | 60.29531545 | 0.156266532 | 0.118090147 |
| 543 | 7      | 1.945910149 | 36.80095787 | 0.052876617 | 0.012771505 |
| 544 | 274859 | 12.52401352 | 159.715531  | 0.0784145   | 0.063997916 |
| 545 | 274855 | 12.52399896 | 154.3528154 | 0.081138779 | 0.066221316 |
| 546 | 6802   | 8.824971966 | 145.450314  | 0.060673447 | 0.044851805 |
| 547 | 6800   | 8.824677891 | 111.7693475 | 0.078954365 | 0.058364978 |
| 548 | 5561   | 8.623533227 | 109.7820287 | 0.078551411 | 0.057591988 |
| 549 | 47     | 3.850147602 | 86.20719521 | 0.044661557 | 0.019984023 |
| 550 | 5514   | 8.615045592 | 86.20719521 | 0.099934183 | 0.073243206 |
| 551 | 4790   | 8.47428569  | 72.32745354 | 0.117165547 | 0.08535594  |
| 552 | 268053 | 12.49894    | 145.450314  | 0.085932712 | 0.07010221  |
| 553 | 267851 | 12.49818613 | 141.4286622 | 0.088370956 | 0.0720903   |
| 554 | 2590   | 7.859413155 | 139.9728021 | 0.056149574 | 0.039724124 |
| 555 | 2585   | 7.857480787 | 102.0936565 | 0.076963457 | 0.054443846 |
| 556 | 265261 | 12.48846953 | 139.9728021 | 0.089220687 | 0.072770697 |
| 557 | 265259 | 12.48846199 | 136.2758753 | 0.091641033 | 0.074744784 |
| 558 | 144    | 4.9698133   | 134.1260727 | 0.037053298 | 0.020337976 |
| 559 | 265115 | 12.48791897 | 134.1260727 | 0.093105827 | 0.075938761 |
| 560 | 74     | 4.304065093 | 128.6151585 | 0.03346468  | 0.016454169 |
| 561 | 265041 | 12.48763981 | 128.6151585 | 0.097093064 | 0.079190422 |
| 562 | 146137 | 11.89229982 | 125.8278758 | 0.094512442 | 0.076213448 |
| 563 | 145648 | 11.88894803 | 123.4400501 | 0.096313539 | 0.077660571 |
| 564 | 4      | 1.386294361 | 120.3972274 | 0.011514338 | 0.002179155 |
| 565 | 145644 | 11.88892057 | 120.3972274 | 0.098747461 | 0.079623073 |
| 566 | 3190   | 8.067776196 | 117.4945866 | 0.068665089 | 0.049091695 |
| 567 | 2914   | 7.977281987 | 72.04143866 | 0.110731853 | 0.078812705 |
| 568 | 1430   | 7.265429723 | 58.05093377 | 0.125156122 | 0.085599288 |
| 569 | 1484   | 7.302496424 | 58.05093377 | 0.125794642 | 0.086233888 |
| 570 | 83     | 4.418840608 | 47.4416532  | 0.093142635 | 0.046777533 |
| 571 | 276    | 5.620400866 | 72.04143866 | 0.078016222 | 0.046499683 |
| 572 | 142454 | 11.86677442 | 117.4945866 | 0.100998478 | 0.081401644 |
| 573 | 20161  | 9.911505324 | 114.4614213 | 0.086592541 | 0.066479749 |
| 574 | 4057   | 8.308199063 | 94.50160081 | 0.087915961 | 0.063573843 |
| 575 | 3684   | 8.211754397 | 84.74361255 | 0.09690116  | 0.06975876  |
| 576 | 226    | 5.420534999 | 79.88704896 | 0.067852488 | 0.039518301 |
| 577 | 3458   | 8.148445666 | 79.88704896 | 0.101999583 | 0.073209111 |
| 578 | 373    | 5.92157842  | 84.74361255 | 0.069876398 | 0.04298655  |
| 579 | 179    | 5.187385806 | 68.44719258 | 0.075786685 | 0.042863071 |
| 580 | 28     | 3.33220451  | 63.24196239 | 0.052689771 | 0.020687733 |
| 581 | 27     | 3.295836866 | 46.30557918 | 0.071175805 | 0.027662624 |
| 582 | 16104  | 9.686822967 | 94.50160081 | 0.102504327 | 0.078144672 |
| 583 | 16101  | 9.686636661 | 89.95950998 | 0.107677739 | 0.082088157 |
| 584 | 16096  | 9.686326073 | 84.40816817 | 0.114755791 | 0.087483239 |

|     |        |             |             |             |             |
|-----|--------|-------------|-------------|-------------|-------------|
| 585 | 10     | 2.302585093 | 76.63545778 | 0.030045949 | 0.008375417 |
| 586 | 16086  | 9.685704607 | 76.63545778 | 0.126386726 | 0.096348075 |
| 587 | 7037   | 8.858937222 | 66.4812136  | 0.133254746 | 0.098638847 |
| 588 | 4101   | 8.318986125 | 53.1372465  | 0.15655659  | 0.113265056 |
| 589 | 9049   | 9.110409533 | 66.4812136  | 0.137037353 | 0.102417182 |
| 590 | 9044   | 9.109856833 | 61.40540184 | 0.148355952 | 0.110874063 |
| 591 | 9002   | 9.105202054 | 57.6842953  | 0.157845424 | 0.117945729 |
| 592 | 4337   | 8.374938144 | 54.92455826 | 0.152480756 | 0.110595811 |
| 593 | 4331   | 8.373553741 | 46.66530212 | 0.179438541 | 0.130140474 |
| 594 | 4330   | 8.373322821 | 42.39172643 | 0.197522572 | 0.143254701 |
| 595 | 744    | 6.612041035 | 35.28304796 | 0.187399939 | 0.122480352 |
| 596 | 736    | 6.601230119 | 33.95061745 | 0.194436232 | 0.126972628 |
| 597 | 648    | 6.473890696 | 28.29835622 | 0.228772677 | 0.147891944 |
| 598 | 4665   | 8.447843113 | 54.92455826 | 0.153808121 | 0.111920525 |
| 599 | 4500   | 8.411832676 | 47.15959015 | 0.178369503 | 0.129586486 |
| 600 | 4480   | 8.407378325 | 36.016016   | 0.233434434 | 0.169557903 |
| 601 | 4457   | 8.402231173 | 33.37533608 | 0.25174971  | 0.182819533 |
| 602 | 147    | 4.990432587 | 31.22232049 | 0.159835416 | 0.087990606 |
| 603 | 4310   | 8.368693183 | 31.22232049 | 0.268035593 | 0.194354359 |
| 604 | 4271   | 8.359603271 | 25.11076395 | 0.332909157 | 0.241295853 |
| 605 | 3915   | 8.272570608 | 21.16456282 | 0.390868958 | 0.28218309  |
| 606 | 122293 | 11.71417508 | 114.4614213 | 0.102341688 | 0.08222564  |
| 607 | 892    | 6.793466133 | 106.0460973 | 0.064061444 | 0.042443053 |
| 608 | 868    | 6.766191715 | 90.11029867 | 0.075087885 | 0.049649396 |
| 609 | 737    | 6.602587892 | 69.20748984 | 0.095402794 | 0.062307425 |
| 610 | 732    | 6.595780514 | 65.20287884 | 0.101157811 | 0.066031065 |
| 611 | 5      | 1.609437912 | 65.20287884 | 0.024683541 | 0.005160389 |
| 612 | 121401 | 11.70685439 | 106.0460973 | 0.110394014 | 0.088681655 |
| 613 | 15790  | 9.667132107 | 104.2608699 | 0.092720616 | 0.070641237 |
| 614 | 1222   | 7.10824414  | 92.97176657 | 0.076455944 | 0.051768372 |
| 615 | 170    | 5.135798437 | 45.84845471 | 0.112016827 | 0.062920348 |
| 616 | 14568  | 9.586582621 | 92.97176657 | 0.103112837 | 0.078352982 |
| 617 | 14216  | 9.56212337  | 69.45681165 | 0.137670059 | 0.10452785  |
| 618 | 794    | 6.677083461 | 66.3354971  | 0.100656266 | 0.066114973 |
| 619 | 13422  | 9.504650431 | 66.3354971  | 0.143281514 | 0.108580413 |
| 620 | 5997   | 8.699014623 | 63.04143767 | 0.137988836 | 0.101487678 |
| 621 | 4604   | 8.43468077  | 59.1429713  | 0.1426151   | 0.103715597 |
| 622 | 7425   | 8.912607964 | 63.04143767 | 0.141376978 | 0.104871248 |
| 623 | 573    | 6.350885717 | 61.23734472 | 0.103709358 | 0.06636286  |
| 624 | 6852   | 8.832295859 | 61.23734472 | 0.144230549 | 0.106650989 |
| 625 | 622    | 6.432940093 | 56.61872556 | 0.113618596 | 0.073204063 |
| 626 | 202    | 5.308267697 | 51.09676776 | 0.103886565 | 0.059676437 |
| 627 | 6230   | 8.737131612 | 56.61872556 | 0.154315229 | 0.113672465 |
| 628 | 5740   | 8.655214489 | 54.24032064 | 0.159571595 | 0.117148941 |
| 629 | 399    | 5.988961417 | 46.58690261 | 0.128554617 | 0.079607827 |
| 630 | 316    | 5.755742214 | 39.34976292 | 0.146271331 | 0.08846915  |
| 631 | 5341   | 8.58316818  | 46.58690261 | 0.184239941 | 0.134850492 |
| 632 | 5249   | 8.565792861 | 38.74572292 | 0.221077121 | 0.161693225 |
| 633 | 490    | 6.194405391 | 54.24032064 | 0.114202964 | 0.072086982 |

|     |        |             |             |             |             |
|-----|--------|-------------|-------------|-------------|-------------|
| 634 | 105611 | 11.56751781 | 104.2608699 | 0.110947835 | 0.088863808 |
| 635 | 37333  | 10.52763293 | 97.52301074 | 0.107950245 | 0.084342032 |
| 636 | 883    | 6.783325201 | 92.49744654 | 0.07333527  | 0.048551406 |
| 637 | 127    | 4.844187086 | 86.57352478 | 0.055954602 | 0.030148591 |
| 638 | 756    | 6.628041376 | 86.57352478 | 0.07655968  | 0.050099505 |
| 639 | 751    | 6.621405652 | 52.89809041 | 0.125172867 | 0.08186937  |
| 640 | 36450  | 10.50369674 | 92.49744654 | 0.113556613 | 0.088665783 |
| 641 | 26994  | 10.2033699  | 76.03592689 | 0.134191432 | 0.103912959 |
| 642 | 2518   | 7.831220215 | 58.77209391 | 0.133247256 | 0.094129759 |
| 643 | 2505   | 7.826044014 | 52.99281432 | 0.14768123  | 0.104298014 |
| 644 | 24476  | 10.10544832 | 58.77209391 | 0.171942969 | 0.13277102  |
| 645 | 24320  | 10.09905434 | 49.31506659 | 0.204786387 | 0.15810258  |
| 646 | 24215  | 10.09472755 | 40.3541869  | 0.250153165 | 0.193102988 |
| 647 | 23663  | 10.07166793 | 26.09851914 | 0.385909556 | 0.297697469 |
| 648 | 156    | 5.049856007 | 49.31506659 | 0.102399862 | 0.056845921 |
| 649 | 48     | 3.871201011 | 44.88659997 | 0.086244024 | 0.038774738 |
| 650 | 37     | 3.610917913 | 39.35494311 | 0.091752589 | 0.038776738 |
| 651 | 9456   | 9.15440474  | 76.03592689 | 0.12039578  | 0.090125435 |
| 652 | 9362   | 9.144414222 | 68.97657865 | 0.132572743 | 0.099204544 |
| 653 | 127    | 4.844187086 | 65.51146834 | 0.073944108 | 0.039841418 |
| 654 | 9235   | 9.130755893 | 65.51146834 | 0.13937645  | 0.104243502 |
| 655 | 2016   | 7.608870629 | 62.44676416 | 0.121845715 | 0.085044277 |
| 656 | 1981   | 7.591357047 | 56.5273999  | 0.134295175 | 0.093641399 |
| 657 | 7219   | 8.884471718 | 62.44676416 | 0.142272732 | 0.105419915 |
| 658 | 7217   | 8.884194633 | 55.14896474 | 0.161094495 | 0.119364994 |
| 659 | 7208   | 8.882946799 | 42.02321871 | 0.211381876 | 0.156618406 |
| 660 | 7201   | 8.881975184 | 38.76819514 | 0.229104686 | 0.169743242 |
| 661 | 6869   | 8.834773814 | 29.49326182 | 0.29955228  | 0.221525111 |
| 662 | 5164   | 8.549466752 | 26.71643709 | 0.320007744 | 0.233886837 |
| 663 | 68278  | 11.13134289 | 97.52301074 | 0.114140681 | 0.090531348 |
| 664 | 37     | 3.610917913 | 89.55229841 | 0.04032189  | 0.017040951 |
| 665 | 9      | 2.197224577 | 86.81620697 | 0.025308922 | 0.006770472 |
| 666 | 28     | 3.33220451  | 86.81620697 | 0.038382286 | 0.015070145 |
| 667 | 68241  | 11.13080084 | 89.55229841 | 0.12429386  | 0.098583149 |
| 668 | 67988  | 11.1270865  | 86.84515388 | 0.128125589 | 0.101613428 |
| 669 | 67981  | 11.12698353 | 75.04243147 | 0.148275893 | 0.117593882 |
| 670 | 24071  | 10.08876308 | 71.59311379 | 0.140918065 | 0.108761184 |
| 671 | 9812   | 9.191361405 | 56.05093645 | 0.163982299 | 0.12291843  |
| 672 | 7634   | 8.940367233 | 43.53689729 | 0.205351502 | 0.152490434 |
| 673 | 7055   | 8.861491864 | 40.34720521 | 0.219630872 | 0.162593211 |
| 674 | 43910  | 10.68989736 | 71.59311379 | 0.149314603 | 0.117155363 |
| 675 | 39585  | 10.58620554 | 68.07149626 | 0.155515981 | 0.121693341 |
| 676 | 6988   | 8.851949671 | 66.53044703 | 0.133051108 | 0.09846096  |
| 677 | 6963   | 8.848365695 | 51.81820194 | 0.170757868 | 0.12634696  |
| 678 | 25     | 3.218875825 | 51.81820194 | 0.062118632 | 0.02361671  |
| 679 | 20     | 2.995732274 | 47.51365862 | 0.063049918 | 0.022408519 |
| 680 | 32597  | 10.39197554 | 66.53044703 | 0.156198793 | 0.121593449 |
| 681 | 32596  | 10.39194486 | 55.32507879 | 0.187834253 | 0.146220051 |
| 682 | 723    | 6.583409222 | 50.95569067 | 0.129198705 | 0.084253503 |

|     |        |             |             |             |             |
|-----|--------|-------------|-------------|-------------|-------------|
| 683 | 31873  | 10.36951454 | 50.95569067 | 0.203500618 | 0.158318171 |
| 684 | 31869  | 10.36938903 | 46.82677449 | 0.221441454 | 0.17227508  |
| 685 | 4376   | 8.383890344 | 40.0345209  | 0.209416527 | 0.151952857 |
| 686 | 27493  | 10.22168671 | 40.0345209  | 0.255321819 | 0.197815004 |
| 687 | 24334  | 10.09962983 | 38.66758793 | 0.2611911   | 0.201652468 |
| 688 | 21302  | 9.966556244 | 36.031762   | 0.276604742 | 0.21271215  |
| 689 | 21261  | 9.964629687 | 34.42610025 | 0.289449854 | 0.222577282 |
| 690 | 11662  | 9.364090972 | 32.62759722 | 0.286999098 | 0.216451039 |
| 691 | 3218   | 8.076515328 | 29.43772786 | 0.274359331 | 0.196235359 |
| 692 | 2877   | 7.964503364 | 26.8783969  | 0.29631616  | 0.210765607 |
| 693 | 9599   | 9.169414205 | 32.62759722 | 0.281032469 | 0.210489489 |
| 694 | 1115   | 7.016609684 | 30.69062766 | 0.228623857 | 0.153860129 |
| 695 | 8484   | 9.045937316 | 30.69062766 | 0.294745921 | 0.219754791 |
| 696 | 982    | 6.889591308 | 29.61166416 | 0.232664779 | 0.15521348  |
| 697 | 7502   | 8.922924931 | 29.61166416 | 0.301331424 | 0.223612518 |
| 698 | 367    | 5.905361848 | 28.47748278 | 0.207369517 | 0.127363927 |
| 699 | 336    | 5.817111116 | 25.57586631 | 0.227445322 | 0.138449243 |
| 700 | 7135   | 8.87276753  | 28.47748278 | 0.311571342 | 0.230759266 |
| 701 | 6743   | 8.816260209 | 25.91840832 | 0.340154384 | 0.251366089 |
| 702 | 118904 | 11.68607172 | 125.8278758 | 0.092873472 | 0.074574591 |
| 703 | 4259   | 8.35678967  | 123.5674879 | 0.067629356 | 0.049012209 |
| 704 | 4248   | 8.354203563 | 92.397749   | 0.090415661 | 0.065518207 |
| 705 | 233    | 5.451038454 | 83.81818225 | 0.065034081 | 0.038015053 |
| 706 | 194    | 5.267858159 | 80.5354586  | 0.06541042  | 0.037382551 |
| 707 | 173    | 5.153291594 | 63.45600354 | 0.081210466 | 0.045723358 |
| 708 | 38     | 3.63758616  | 60.00476455 | 0.060621622 | 0.02579066  |
| 709 | 4015   | 8.297792626 | 83.81818225 | 0.098997525 | 0.07155305  |
| 710 | 1679   | 7.425953657 | 79.86540095 | 0.09298086  | 0.064216977 |
| 711 | 1652   | 7.409741954 | 58.32187766 | 0.127049098 | 0.087661616 |
| 712 | 2336   | 7.756195344 | 79.86540095 | 0.097115838 | 0.068333165 |
| 713 | 175    | 5.164785974 | 64.60988223 | 0.079938019 | 0.045075932 |
| 714 | 173    | 5.153291594 | 50.46503923 | 0.102116072 | 0.057493695 |
| 715 | 172    | 5.147494477 | 41.17369306 | 0.125019013 | 0.070334034 |
| 716 | 114645 | 11.64959568 | 123.5674879 | 0.094277191 | 0.075643596 |
| 717 | 113315 | 11.63792683 | 121.8333858 | 0.095523298 | 0.076624491 |
| 718 | 42740  | 10.66289053 | 117.3133986 | 0.09089235  | 0.071266506 |
| 719 | 18959  | 9.850034032 | 114.7542296 | 0.085835913 | 0.065774687 |
| 720 | 1905   | 7.552237288 | 111.8225425 | 0.0675377   | 0.046988428 |
| 721 | 50     | 3.912023005 | 96.7590816  | 0.040430551 | 0.018344039 |
| 722 | 17054  | 9.744140059 | 111.8225425 | 0.087139318 | 0.066552614 |
| 723 | 16323  | 9.700330435 | 90.68547453 | 0.106966749 | 0.081581936 |
| 724 | 2026   | 7.613818685 | 89.20845746 | 0.085348619 | 0.059587019 |
| 725 | 14297  | 9.567805004 | 89.20845746 | 0.107252219 | 0.081447986 |
| 726 | 6479   | 8.776321456 | 83.25710909 | 0.105412277 | 0.077772632 |
| 727 | 7818   | 8.964184046 | 83.25710909 | 0.107668692 | 0.080026193 |
| 728 | 101    | 4.615120517 | 55.70918397 | 0.082843082 | 0.043043087 |
| 729 | 91     | 4.510859507 | 29.63617172 | 0.152207902 | 0.077695092 |
| 730 | 23781  | 10.07664222 | 114.7542296 | 0.087810639 | 0.067748575 |
| 731 | 80     | 4.382026635 | 111.702544  | 0.039229426 | 0.019570291 |

|     |       |             |             |             |             |
|-----|-------|-------------|-------------|-------------|-------------|
| 732 | 7     | 1.945910149 | 81.85140441 | 0.023773693 | 0.005742157 |
| 733 | 5     | 1.609437912 | 60.56477709 | 0.026573827 | 0.005555576 |
| 734 | 73    | 4.290459441 | 81.85140441 | 0.052417664 | 0.025706757 |
| 735 | 21    | 3.044522438 | 27.40961875 | 0.111074965 | 0.040081269 |
| 736 | 20    | 2.995732274 | 20.30628641 | 0.147527333 | 0.052432568 |
| 737 | 23701 | 10.07327252 | 111.702544  | 0.090179437 | 0.069569294 |
| 738 | 23640 | 10.07069547 | 108.2001612 | 0.093074681 | 0.071797407 |
| 739 | 8503  | 9.048174321 | 101.6917605 | 0.088976474 | 0.066344088 |
| 740 | 8498  | 9.047586121 | 70.4687758  | 0.128391419 | 0.095731187 |
| 741 | 8481  | 9.045583646 | 66.33263859 | 0.136367011 | 0.101670299 |
| 742 | 2227  | 7.708410667 | 63.34046658 | 0.12169804  | 0.085409203 |
| 743 | 2218  | 7.704361168 | 58.84244515 | 0.130932036 | 0.091869493 |
| 744 | 6254  | 8.740976538 | 63.34046658 | 0.137999876 | 0.101670067 |
| 745 | 3672  | 8.208491752 | 61.72184359 | 0.132991681 | 0.095725505 |
| 746 | 2826  | 7.946617563 | 51.86289514 | 0.153223563 | 0.108887329 |
| 747 | 15137 | 9.624897357 | 101.6917605 | 0.09464776  | 0.072010816 |
| 748 | 31    | 3.433987204 | 95.99419293 | 0.035772864 | 0.01444144  |
| 749 | 29    | 3.36729583  | 86.0878453  | 0.039114649 | 0.015507428 |
| 750 | 15106 | 9.622847295 | 95.99419293 | 0.100244056 | 0.076263549 |
| 751 | 8929  | 9.097059686 | 90.49437905 | 0.10052624  | 0.075092863 |
| 752 | 8921  | 9.096163327 | 71.5154189  | 0.127191639 | 0.095008694 |
| 753 | 7732  | 8.95312284  | 67.31784726 | 0.132997759 | 0.098810365 |
| 754 | 6727  | 8.813884558 | 63.34412155 | 0.139142897 | 0.102813589 |
| 755 | 16    | 2.772588722 | 56.57416497 | 0.049008036 | 0.016196275 |
| 756 | 1005  | 6.91274282  | 63.34412155 | 0.109129982 | 0.072920312 |
| 757 | 983   | 6.89060912  | 60.36405779 | 0.11415086  | 0.076156875 |
| 758 | 958   | 6.864847778 | 55.24376474 | 0.124264662 | 0.082753473 |
| 759 | 545   | 6.300785795 | 35.31651188 | 0.178409063 | 0.113674295 |
| 760 | 6177  | 8.728587996 | 90.49437905 | 0.096454477 | 0.071026056 |
| 761 | 125   | 4.828313737 | 79.43392478 | 0.060784026 | 0.032671868 |
| 762 | 6052  | 8.708144075 | 79.43392478 | 0.109627519 | 0.080658799 |
| 763 | 88    | 4.477336814 | 77.66028148 | 0.057652853 | 0.029257245 |
| 764 | 5964  | 8.693496676 | 77.66028148 | 0.111942637 | 0.082312598 |
| 765 | 5963  | 8.693328989 | 69.17505053 | 0.125671451 | 0.092406901 |
| 766 | 5951  | 8.691314552 | 67.78398342 | 0.12822077  | 0.094273608 |
| 767 | 25    | 3.218875825 | 61.24427193 | 0.05255799  | 0.019981876 |
| 768 | 23    | 3.135494216 | 53.92462586 | 0.058145869 | 0.021569938 |
| 769 | 5926  | 8.687104728 | 61.24427193 | 0.141843546 | 0.104271583 |
| 770 | 5925  | 8.686935966 | 57.32766188 | 0.151531315 | 0.11139245  |
| 771 | 125   | 4.828313737 | 49.61364876 | 0.097318255 | 0.052309289 |
| 772 | 5800  | 8.665613197 | 49.61364876 | 0.174661881 | 0.128282817 |
| 773 | 5798  | 8.665268309 | 46.02151982 | 0.188287313 | 0.138288225 |
| 774 | 5797  | 8.665095821 | 42.42999797 | 0.204220981 | 0.149989686 |
| 775 | 5232  | 8.562548893 | 30.37465458 | 0.28189782  | 0.20614827  |
| 776 | 70575 | 11.16443125 | 117.3133986 | 0.095167572 | 0.075541019 |
| 777 | 411   | 6.018593214 | 113.4596728 | 0.053046101 | 0.032942715 |
| 778 | 70164 | 11.15859064 | 113.4596728 | 0.098348518 | 0.078055344 |
| 779 | 43808 | 10.68757173 | 111.6017071 | 0.095765307 | 0.07513498  |
| 780 | 21325 | 9.967635372 | 103.4838132 | 0.09632072  | 0.074074118 |



---

|     |       |             |             |             |             |
|-----|-------|-------------|-------------|-------------|-------------|
| 781 | 21318 | 9.967307065 | 64.66495955 | 0.154137683 | 0.118536285 |
| 782 | 1918  | 7.559038255 | 59.36417161 | 0.12733334  | 0.088624745 |
| 783 | 22483 | 10.02051475 | 103.4838132 | 0.096831712 | 0.0745849   |
| 784 | 17479 | 9.768755439 | 101.4882165 | 0.096255071 | 0.073571941 |
| 785 | 17478 | 9.768698226 | 94.19025976 | 0.103712404 | 0.079271763 |
| 786 | 5736  | 8.654517382 | 83.26822135 | 0.103935418 | 0.076301619 |
| 787 | 1603  | 7.379632153 | 68.49198814 | 0.107744458 | 0.074207889 |
| 788 | 1602  | 7.379008128 | 59.74829742 | 0.123501563 | 0.08505724  |
| 789 | 1472  | 7.294377299 | 57.78109636 | 0.126241587 | 0.086496935 |
| 790 | 4133  | 8.326758815 | 68.49198814 | 0.121572742 | 0.087986188 |
| 791 | 4019  | 8.298788394 | 56.54550558 | 0.146763006 | 0.106081643 |
| 792 | 3885  | 8.264878263 | 44.20983027 | 0.186946618 | 0.134915856 |
| 793 | 5004  | 8.517992872 | 101.4882165 | 0.083930856 | 0.06126036  |
| 794 | 3196  | 8.069655307 | 97.97473175 | 0.082364658 | 0.058891534 |
| 795 | 3121  | 8.045908742 | 60.26012798 | 0.133519609 | 0.095356638 |
| 796 | 21    | 3.044522438 | 55.82175002 | 0.054540075 | 0.019680721 |
| 797 | 3100  | 8.03915739  | 55.82175002 | 0.144014786 | 0.102817832 |
| 798 | 1743  | 7.463363046 | 52.84296866 | 0.141236634 | 0.097759992 |
| 799 | 1740  | 7.461640392 | 40.80701748 | 0.182851893 | 0.126552115 |
| 800 | 75    | 4.317488114 | 60.26012798 | 0.07164751  | 0.035317411 |
| 801 | 1808  | 7.499976541 | 97.97473175 | 0.07655011  | 0.053098966 |
| 802 | 1767  | 7.477038472 | 80.68147562 | 0.092673546 | 0.064197312 |
| 803 | 605   | 6.405228458 | 58.01908573 | 0.110398645 | 0.070966472 |
| 804 | 247   | 5.509388337 | 42.02562963 | 0.131095914 | 0.077157496 |
| 805 | 358   | 5.880532986 | 42.02562963 | 0.139927302 | 0.085728085 |
| 806 | 265   | 5.579729826 | 32.80662519 | 0.17007936  | 0.100910807 |
| 807 | 26356 | 10.17945123 | 111.6017071 | 0.091212325 | 0.070583217 |
| 808 | 1772  | 7.479864131 | 107.4858296 | 0.069589305 | 0.048214218 |
| 809 | 24584 | 10.1098511  | 107.4858296 | 0.094057525 | 0.07263871  |
| 810 | 2575  | 7.853604813 | 106.4088433 | 0.073805941 | 0.052199691 |
| 811 | 2569  | 7.851271997 | 98.37378718 | 0.07981061  | 0.05643967  |
| 812 | 1226  | 7.111512116 | 61.67424942 | 0.115307639 | 0.078091606 |
| 813 | 1343  | 7.202661197 | 61.67424942 | 0.116785551 | 0.07955922  |
| 814 | 893   | 6.794586581 | 47.42032316 | 0.143284274 | 0.094938818 |
| 815 | 67    | 4.204692619 | 42.26728324 | 0.099478658 | 0.04798388  |
| 816 | 22009 | 9.99920674  | 106.4088433 | 0.093969697 | 0.0723345   |
| 817 | 5298  | 8.57508467  | 100.5149849 | 0.085311505 | 0.062420513 |
| 818 | 477   | 6.167516491 | 99.35880992 | 0.062073172 | 0.039086856 |
| 819 | 475   | 6.163314804 | 93.98401306 | 0.065578332 | 0.041278295 |
| 820 | 4821  | 8.480736654 | 99.35880992 | 0.085354652 | 0.06219898  |
| 821 | 1691  | 7.433075349 | 97.87357084 | 0.075945685 | 0.052473803 |
| 822 | 3130  | 8.048788284 | 97.87357084 | 0.082236586 | 0.058739805 |
| 823 | 2739  | 7.915348169 | 94.91358957 | 0.083395309 | 0.059170068 |
| 824 | 1351  | 7.208600338 | 89.77772984 | 0.080293859 | 0.054720195 |
| 825 | 1388  | 7.235619141 | 89.77772984 | 0.080594811 | 0.055019182 |
| 826 | 1142  | 7.04053639  | 87.05739757 | 0.080872351 | 0.054513476 |
| 827 | 16711 | 9.723822464 | 100.5149849 | 0.096740028 | 0.073837506 |
| 828 | 6789  | 8.823058934 | 97.67782763 | 0.090328165 | 0.066768465 |
| 829 | 6779  | 8.821584877 | 84.33848877 | 0.104597379 | 0.077311399 |

---

---

|     |      |             |             |             |             |
|-----|------|-------------|-------------|-------------|-------------|
| 830 | 9922 | 9.202509793 | 97.67782763 | 0.094212883 | 0.070648903 |
| 831 | 3089 | 8.035602693 | 86.23435909 | 0.093183306 | 0.066515563 |
| 832 | 2272 | 7.72841578  | 79.43999726 | 0.097286204 | 0.068350759 |
| 833 | 817  | 6.705639095 | 79.43999726 | 0.084411371 | 0.055564071 |
| 834 | 808  | 6.694562059 | 64.9310724  | 0.103102595 | 0.067811201 |
| 835 | 257  | 5.549076085 | 52.43271478 | 0.105832324 | 0.062573743 |
| 836 | 551  | 6.311734809 | 52.43271478 | 0.120377799 | 0.076771758 |
| 837 | 6833 | 8.829519095 | 86.23435909 | 0.102389804 | 0.075703587 |
| 838 | 316  | 5.755742214 | 80.99875898 | 0.071059635 | 0.042978931 |
| 839 | 222  | 5.402677382 | 75.07424339 | 0.07196446  | 0.041823034 |
| 840 | 94   | 4.543294782 | 75.07424339 | 0.060517357 | 0.031064501 |
| 841 | 6517 | 8.782169426 | 80.99875898 | 0.108423506 | 0.080013132 |
| 842 | 38   | 3.63758616  | 75.97879268 | 0.047876335 | 0.020368348 |
| 843 | 6479 | 8.776321456 | 75.97879268 | 0.115510146 | 0.085222787 |
| 844 | 5446 | 8.602636673 | 72.31582925 | 0.118959248 | 0.087141403 |
| 845 | 5400 | 8.594154233 | 65.71780396 | 0.130773606 | 0.095761484 |
| 846 | 5197 | 8.555836815 | 59.30228081 | 0.144275004 | 0.105476247 |
| 847 | 2997 | 8.005367067 | 57.66459364 | 0.138826385 | 0.098947727 |
| 848 | 2200 | 7.696212639 | 57.66459364 | 0.133465133 | 0.093605274 |
| 849 | 2198 | 7.695303135 | 55.58551727 | 0.138440794 | 0.097090116 |

---
