# Supplementary material for: A Complete Fossil-Calibrated Phylogeny of Seed Plant Families as a Tool for Comparative Analyses: Testing the ‘Time for Speciation’ Hypothesis
Source: PubMed Central journal article supplement (PMC5051821; doi:10.1371/journal.pone.0162907), 2016-10-05
Supplement: pone.0162907.s007.pdf [file pone.0162907.s007.pdf]

Table S5: Model parameters for the MEDUSA model. These models are mapped to the phylogeny in Fig 3.

| Model Number | Diversification Rate (r) | Extinction rate ( $\epsilon$ ) | Lower Bound (r) | Upper Bound (r) | Lower Bound ( $\epsilon$ ) | Upper Bound ( $\epsilon$ ) |
|--------------|--------------------------|--------------------------------|-----------------|-----------------|----------------------------|----------------------------|
| 1            | 0.006                    | 0.993                          | 0.004           | 0.008           | 0.990                      | 1.000                      |
| 2            | 0.050                    | 0.974                          | 0.048           | 0.053           | 0.971                      | 1.000                      |
| 3            | 0.537                    | NA                             | 0.458           | 0.690           | NA                         | NA                         |
| 4            | 0.256                    | NA                             | 0.216           | 0.334           | NA                         | NA                         |
| 5            | 0.038                    | NA                             | 0.025           | 0.056           | NA                         | NA                         |
| 6            | 0.384                    | NA                             | 0.317           | 0.513           | NA                         | NA                         |
| 7            | 0.438                    | NA                             | 0.360           | 0.590           | NA                         | NA                         |
| 8            | 0.300                    | NA                             | 0.250           | 0.397           | NA                         | NA                         |
| 9            | 0.262                    | NA                             | 0.230           | 0.307           | NA                         | NA                         |
| 10           | 0.270                    | NA                             | 0.223           | 0.360           | NA                         | NA                         |
| 11           | 0.153                    | NA                             | 0.136           | 0.178           | NA                         | NA                         |
| 12           | 0.237                    | NA                             | 0.196           | 0.315           | NA                         | NA                         |
| 13           | 0.228                    | NA                             | 0.211           | 0.249           | NA                         | NA                         |
| 14           | 0.035                    | 0.826                          | 0.027           | 0.045           | 0.696                      | 1.000                      |
| 15           | 0.021                    | NA                             | 0.000           | 0.046           | NA                         | NA                         |
| 16           | 0.031                    | NA                             | 0.020           | 0.049           | NA                         | NA                         |
| 17           | 0.325                    | NA                             | 0.285           | 0.382           | NA                         | NA                         |
| 18           | 0.088                    | 0.987                          | 0.076           | 0.104           | 0.978                      | 1.000                      |
| 19           | 0.057                    | NA                             | 0.034           | 0.092           | NA                         | NA                         |
| 20           | 0.221                    | NA                             | 0.195           | 0.257           | NA                         | NA                         |
| 21           | 0.219                    | NA                             | 0.187           | 0.271           | NA                         | NA                         |
| 22           | 0.065                    | NA                             | 0.052           | 0.082           | NA                         | NA                         |
| 23           | 0.015                    | NA                             | 0.000           | 0.041           | NA                         | NA                         |
| 24           | 0.038                    | NA                             | 0.000           | 0.069           | NA                         | NA                         |
| 25           | 0.000                    | NA                             | 0.000           | 0.016           | NA                         | NA                         |
| 26           | 0.005                    | NA                             | 0.000           | 0.022           | NA                         | NA                         |
| 27           | 0.011                    | NA                             | 0.000           | 0.048           | NA                         | NA                         |
| 28           | 0.000                    | NA                             | 0.000           | 0.035           | NA                         | NA                         |
| 29           | 0.161                    | NA                             | 0.134           | 0.212           | NA                         | NA                         |
| 30           | 0.162                    | NA                             | 0.142           | 0.191           | NA                         | NA                         |
| 31           | 0.005                    | NA                             | 0.000           | 0.024           | NA                         | NA                         |
| 32           | 0.009                    | NA                             | 0.000           | 0.027           | NA                         | NA                         |
| 33           | 0.024                    | NA                             | 0.000           | 0.053           | NA                         | NA                         |
| 34           | 0.406                    | NA                             | 0.337           | 0.538           | NA                         | NA                         |
| 35           | 0.308                    | NA                             | 0.274           | 0.355           | NA                         | NA                         |
| 36           | 0.000                    | NA                             | 0.000           | 0.020           | NA                         | NA                         |
| 37           | 0.023                    | NA                             | 0.000           | 0.063           | NA                         | NA                         |
| 38           | 0.006                    | NA                             | 0.000           | 0.029           | NA                         | NA                         |
| 39           | 0.156                    | NA                             | 0.130           | 0.206           | NA                         | NA                         |
| 40           | 0.011                    | NA                             | 0.000           | 0.033           | NA                         | NA                         |
| 41           | 0.039                    | NA                             | 0.027           | 0.057           | NA                         | NA                         |
| 42           | 0.000                    | NA                             | 0.000           | 0.027           | NA                         | NA                         |
| 43           | 0.000                    | NA                             | 0.000           | 0.027           | NA                         | NA                         |
| 44           | 0.000                    | NA                             | 0.000           | 0.028           | NA                         | NA                         |
| 45           | 0.033                    | NA                             | 0.000           | 0.073           | NA                         | NA                         |
| 46           | 0.179                    | NA                             | 0.129           | 0.276           | NA                         | NA                         |
| 47           | 0.007                    | NA                             | 0.000           | 0.035           | NA                         | NA                         |

---

|    |       |       |       |       |       |       |
|----|-------|-------|-------|-------|-------|-------|
| 48 | 0.000 | NA    | 0.000 | 0.032 | NA    | NA    |
| 49 | 0.021 | 0.997 | 0.016 | 0.027 | 0.996 | 1.000 |

---
